# Supplementary material for: Efficient synthesis of multicyclic spirooxindoles via a cascade Michael/Michael/oxa-Michael reaction of curcumins and isatylidene malononitriles
Source: Royal Society of Chemistry journal article supplement (doi:10.1039/c2ob06995d), 2011-12-07
Supplement: c2ob06995d.pdf [file c2ob06995d.pdf]

## Supplementary information

### Efficient synthesis of multicyclic spirooxindoles via a cascade Michael/Michael/oxa-Michael reaction of curcumins and isatylidene malononitriles

Xiao-Gang Yin, Xin-Yun Liu, Zhi-Peng Hu and Ming Yan\*

*Institute of Drug Synthesis and Pharmaceutical Process, School of Pharmaceutical Sciences,*

*Sun Yat-sen University, Guangzhou 510006, China*

*E-mail: [yanming@mail.sysu.edu.cn](mailto:yanming@mail.sysu.edu.cn)*

#### Table of Contents

|                                                                   |        |
|-------------------------------------------------------------------|--------|
| 1. Screening of chiral organocatalysts and reaction solvents..... | S2     |
| 2. Chiral HPLC chromatogram.....                                  | S3     |
| 3. General Methods.....                                           | S3     |
| 4. Typical procedures.....                                        | S4     |
| 5. Spectroscopic data.....                                        | S4-S7  |
| 6. NMR spectra.....                                               | S8-S25 |

## 1. Screening of chiral organocatalysts and reaction solvents

**Table 1** Screening of chiral organocatalysts and solvents<sup>a</sup>

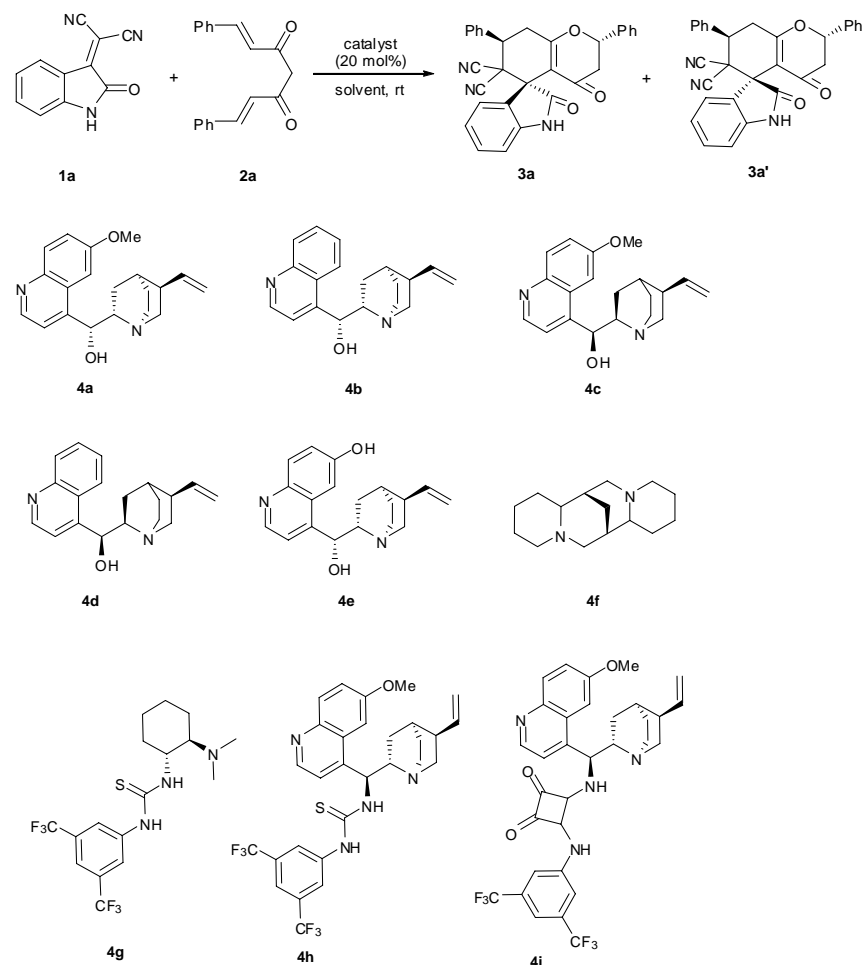

| Entry | Catalyst  | Solvent                         | dr <sup>b</sup> | Time (h) | Yield (%) <sup>c</sup> | Ee (%) <sup>d</sup> |
|-------|-----------|---------------------------------|-----------------|----------|------------------------|---------------------|
| 1     | <b>4a</b> | CH <sub>2</sub> Cl <sub>2</sub> | 80/20           | 24       | 60                     | 2                   |
| 2     | <b>4b</b> | CH <sub>2</sub> Cl <sub>2</sub> | 67/33           | 24       | 76                     | 16                  |
| 3     | <b>4c</b> | CH <sub>2</sub> Cl <sub>2</sub> | 76/24           | 24       | 77                     | 5                   |
| 4     | <b>4d</b> | CH <sub>2</sub> Cl <sub>2</sub> | 76/24           | 24       | 72                     | 1                   |
| 5     | <b>4e</b> | CH <sub>2</sub> Cl <sub>2</sub> | 80/20           | 24       | 40                     | 2                   |
| 6     | <b>4f</b> | CH <sub>2</sub> Cl <sub>2</sub> | ND <sup>e</sup> | 48       | 5                      | ND <sup>e</sup>     |
| 7     | <b>4g</b> | CH <sub>2</sub> Cl <sub>2</sub> | 66/34           | 48       | 62                     | 58                  |
| 8     | <b>4h</b> | CH <sub>2</sub> Cl <sub>2</sub> | 80/20           | 48       | 19                     | 24                  |
| 9     | <b>4i</b> | CH <sub>2</sub> Cl <sub>2</sub> | -               | 48       | NR <sup>f</sup>        | -                   |
| 10    | <b>4g</b> | Toluene                         | 68/32           | 48       | 65                     | 25                  |
| 11    | <b>4g</b> | THF                             | 70/30           | 48       | 34                     | 20                  |
| 12    | <b>4g</b> | Et <sub>2</sub> O               | 63/37           | 48       | 17                     | 37                  |
| 13    | <b>4g</b> | EtOH                            | 77/23           | 48       | 65                     | 38                  |

<sup>a</sup> The reactions were carried out with **1a** (0.05 mmol), **2a** (0.05 mmol) and catalyst (0.01 mmol) in solvent (1 mL) at room temperature. <sup>b</sup> Determined by <sup>1</sup>H NMR analysis of the crude product. <sup>c</sup> Isolated yields after column chromatography. <sup>d</sup> Determined by HPLC with a Chiralpak AS-H. <sup>e</sup> Not determined. <sup>f</sup> No reaction.

### Chiral HPLC chromatogram

Chiralpak AS-H column (4.6 mm × 25 cm), hexane/2-PrOH = 90: 10,  $\lambda$  = 254 nm, 1.0 mL/min);  $t_{\text{major}}$  = 36.6 min,  $t_{\text{minor}}$  = 49.4 min).

### Racemic **3a**

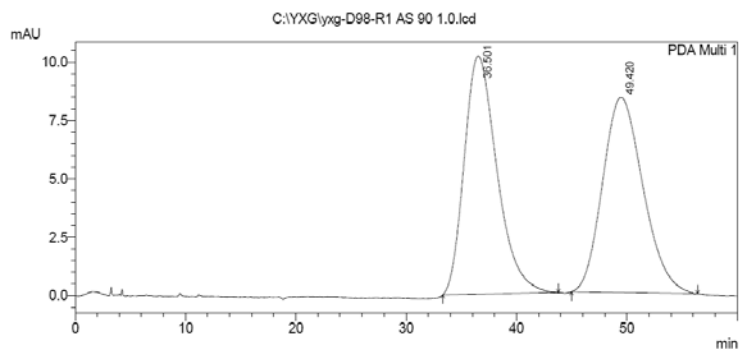

PDA Ch1 254nm 4nm

| Peak# | Ret. Time | Area    | Height | Area %  | Height % |
|-------|-----------|---------|--------|---------|----------|
| 1     | 36.501    | 2104244 | 10190  | 49.722  | 54.966   |
| 2     | 49.420    | 2127734 | 8348   | 50.278  | 45.034   |
| Total |           | 4231978 | 18538  | 100.000 | 100.000  |

### **3a** (58% ee)

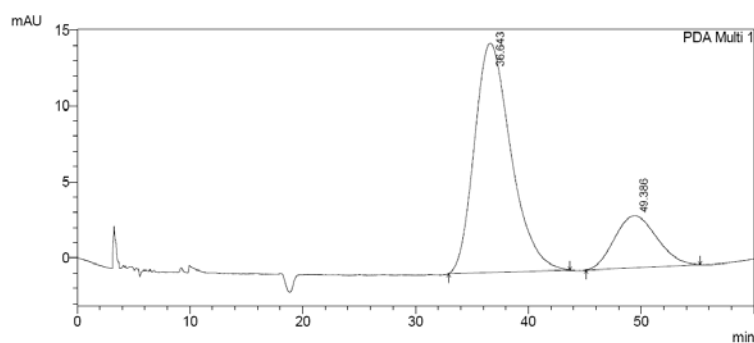

PDA Ch1 254nm 4nm

| Peak# | Ret. Time | Area    | Height | Area %  | Height % |
|-------|-----------|---------|--------|---------|----------|
| 1     | 36.643    | 3406671 | 15078  | 79.212  | 81.486   |
| 2     | 49.386    | 894042  | 3426   | 20.788  | 18.514   |
| Total |           | 4300713 | 18504  | 100.000 | 100.000  |

## 1. General Methods

$^1\text{H}$  and  $^{13}\text{C}$  NMR spectra were recorded on a Bruker Avance 400 MHz spectrometer as solutions in  $\text{CDCl}_3$  or  $\text{DMSO-d}_6$ . Chemical shifts in  $^1\text{H}$  NMR spectra are reported in parts per million (ppm,  $\delta$ ) downfield from the internal standard  $\text{Me}_4\text{Si}$  (TMS,  $\delta = 0$  ppm). Chemical shifts in  $^{13}\text{C}$  NMR spectra are reported relative to the central line of the chloroform signal ( $\delta = 77.0$  ppm). The following abbreviations are used to designate chemical shift multiplicities: s = singlet, d = doublet, m = multiplet. High-resolution mass spectra were obtained with Shimadazu LCMS-IT-TOF mass spectrometer. Optical rotations were measured on a Perkin-Elmer 341 digital polarimeter and are reported as  $[\alpha]_{\text{D}}^{20}$  (c in gram per 100 mL of solvent). Infrared (IR) spectra were recorded on a Bruker Tensor 37 spectrophotometer. Data are represented as follows: frequency of absorption ( $\text{cm}^{-1}$ ), intensity of absorption (s = strong, m = medium, w = weak). The crystallographic data were obtained with

Oxford Diffraction Xcalibur Nova diffractometer. Melting points were recorded on an electrothermal digital melting point apparatus and were uncorrected. TLC analysis was performed on precoated silica gel GF254 slides, and visualised by either UV irradiation. The flash column chromatography was carried out over silica gel (230–400 mesh), purchased from Qingdao Haiyang Chemical Co. Ltd. Unless otherwise stated, all reagents were obtained from commercial sources and used as received. The solvents were used as commercial anhydrous grade without further purification. Enantiomeric excesses were determined by HPLC using a Daicel Chiralpak AS-H column (4.6 mm × 25 cm) and eluting with hexane/2-PrOH solution. Curcumins and isatyliene malononitriles were prepared according to the reported procedures.<sup>1,2</sup>

## 2. Typical procedures

### 2.1 Typical procedure for the reaction of isatyliene malononitriles and curcumins

A mixture of DMAP (0.01 mmol), isatyliene malononitrile **1a** (0.05 mmol) and curcumin **2a** (0.05 mmol) in ethanol (1 mL) was stirred at room temperature for 18 h. After the solvent was evaporated under vacuum, the residue was purified by flash column chromatography over silica gel (petroleum ether/EtOAc = 2: 1) to provide product **3a** as a yellow solid.

### 2.2 Asymmetric reaction of isatyliene malononitrile **1a** and curcumin **2a**

A mixture of Takemoto's catalyst (0.01 mmol), isatyliene malononitrile **1a** (0.05 mmol) and curcumin **2a** (0.05 mmol) in dichloromethane (1 mL) was stirred at room temperature for 48 h. After the solvent was evaporated under vacuum, the residue was purified by flash column chromatography over silica gel (petroleum ether/AcOEt = 2: 1) to provide product **3a** as a yellow solid. The enantiomeric excess of **3a** was determined by HPLC with a Chiralpak AS-H column (4.6 mm × 25 cm) (hexane/2-PrOH = 90: 10,  $\lambda$  = 254 nm, 1.0 mL/min);  $t_{\text{major}}$  = 27.2 min,  $t_{\text{minor}}$  = 35.1 min, 58% ee.

## 3. Spectroscopic data of **3a-3n**

### 3.1 2',4-dioxo-2,7-diphenyl-3,4,7,8-tetrahydrospiro[chromene-5,3'-indoline]-6,6(2H)-dicarbonitrile (**3a**)

Yellow solid, mp 174-176 °C ; <sup>1</sup>H NMR (400 MHz, CDCl<sub>3</sub>)  $\delta$  8.23 (s, 1H), 7.59 – 7.31 (m, 12H), 7.13 (t,  $J$  = 7.7 Hz, 1H), 6.93 (d,  $J$  = 7.7 Hz, 1H), 5.50 (dd,  $J$  = 14.9, 3.0 Hz, 1H), 4.72 (dd,  $J$  = 12.4, 4.7 Hz, 1H), 3.41 (dd,  $J$  = 19.4, 12.4 Hz, 1H), 3.01 (dd,  $J$  = 19.4, 4.7 Hz, 1H), 2.91 (dd,  $J$  = 17.9, 15.0 Hz, 1H), 2.61 (dd,  $J$  = 17.9, 3.0 Hz, 1H); <sup>13</sup>C NMR (100 MHz, CDCl<sub>3</sub>)  $\delta$  188.45, 174.58, 173.30, 168.48, 141.54, 136.76, 134.62, 130.32, 129.58, 129.38, 129.28, 129.00, 128.75, 127.20, 126.37, 124.52, 123.20, 112.34, 111.44, 111.10, 110.80, 81.10, 53.38, 47.73, 42.75, 39.13, 31.79; IR (KBr)  $\nu/\text{cm}^{-1}$ : 3450, 2350, 1739, 1679; HRMS (ESI) calcd for C<sub>30</sub>H<sub>20</sub>N<sub>3</sub>O<sub>3</sub> (M-H)<sup>-</sup>: 470.1504, found: 470.1503.

### 3.2 5'-methoxy-2',4-dioxo-2,7-diphenyl-3,4,7,8-tetrahydrospiro[chromene-5,3'-indoline]-6,6(2H)-dicarbonitrile(**3b**)

Yellow solid. mp 174-176 °C ; <sup>1</sup>H NMR (400 MHz, DMSO)  $\delta$  11.07 (s, 1H), 7.69 – 7.35 (m, 10H), 7.08 (s, 1H), 6.92 (d,  $J$  = 1.2 Hz, 2H), 5.80 (dd,  $J$  = 14.6, 2.8 Hz, 1H), 4.60 (dd,  $J$  = 12.3, 4.8 Hz, 1H), 3.75 (s, 3H), 3.47 – 3.39 (m, 1H), 3.16 (dd,  $J$  = 19.4, 4.8 Hz, 1H), 2.93 (dd,  $J$  = 17.6, 14.8 Hz, 1H), 2.59 (dd,  $J$  = 17.6, 3.1 Hz, 1H); <sup>13</sup>C NMR (100 MHz, DMSO)  $\delta$  188.05, 174.43, 172.55, 154.74, 137.50, 136.07, 135.10, 129.22, 129.00, 128.81, 128.70, 128.56, 126.81, 113.77, 112.20, 112.11, 110.47, 110.07, 80.15, 79.12, 55.40, 53.03, 47.61, 41.93, 30.51; IR (KBr)  $\nu/\text{cm}^{-1}$ : 3490,3035,2961,2250,1729,1677;HRMS (ESI) calcd for C<sub>31</sub>H<sub>22</sub>N<sub>3</sub>O<sub>4</sub> (M-H)<sup>-</sup>: 500.1610, found: 500.1607.

### 3.3 5'-chloro-2',4-dioxo-2,7-diphenyl-3,4,7,8-tetrahydrospiro[chromene-5,3'-indoline]-6,6(2H)-dicarbonitrile(**3c**)

White solid. mp 176-178°C ; <sup>1</sup>H NMR (400 MHz, DMSO) δ 11.41 (s, 1H), 7.57 (d, *J* = 7.0 Hz, 2H), 7.53 – 7.38 (m, 10H), 7.04 (d, *J* = 8.3 Hz, 1H), 5.87 (dd, *J* = 14.6, 2.7 Hz, 1H), 4.56 (dd, *J* = 12.2, 4.8 Hz, 1H), 3.50 – 3.41 (m, 1H), 3.23 – 3.13 (m, 1H), 2.95 (dd, *J* = 17.5, 14.9 Hz, 1H), 2.61 (dd, *J* = 17.6, 3.0 Hz, 1H); <sup>13</sup>C NMR (100 MHz, DMSO) δ 188.27, 174.35, 173.00, 141.91, 137.44, 134.88, 129.87, 129.46, 129.31, 129.04, 128.84, 128.71, 128.57, 126.83, 125.93, 124.57, 112.10, 111.97, 111.62, 109.49, 80.21, 52.89, 47.33, 41.76, 30.44; IR (KBr) *v*/cm<sup>-1</sup>: 3490, 2366, 1721, 1675; HRMS (ESI) calcd for C<sub>30</sub>H<sub>19</sub>N<sub>3</sub>O<sub>3</sub>Cl (M-H)<sup>-</sup>: 504.1115, found: 504.1111.

**3.4 7'-bromo-2',4-dioxo-2,7-diphenyl-3,4,7,8-tetrahydrospiro[chromene-5,3'-indoline]-6,6(2H)-dicarbonitrile(3d)**

Yellow solid. mp 153-155°C ; <sup>1</sup>H NMR (400 MHz, CDCl<sub>3</sub>) δ 8.28 (s, 1H), 7.58 – 7.40 (m, 12H), 7.06 (t, *J* = 7.8 Hz, 1H), 5.52 (d, *J* = 14.8 Hz, 1H), 4.75 – 4.65 (m, 1H), 3.43 (dd, *J* = 19.3, 12.5 Hz, 1H), 3.08 – 2.86 (m, 2H), 2.64 (d, *J* = 17.9 Hz, 1H); <sup>13</sup>C NMR (100 MHz, CDCl<sub>3</sub>) δ 188.28, 173.63, 173.32, 141.05, 136.65, 134.37, 133.13, 129.70, 129.44, 129.35, 129.04, 128.75, 128.50, 126.37, 124.37, 123.39, 112.17, 111.13, 110.74, 103.75, 81.18, 54.70, 47.48, 42.59, 39.18, 31.72; IR (KBr) *v*/cm<sup>-1</sup>: 3482, 2922, 2852, 2360, 1732, 1678 ; HRMS (ESI) calcd for C<sub>30</sub>H<sub>20</sub>N<sub>3</sub>O<sub>3</sub>Br (M-H)<sup>-</sup>: 548.0615, found: 548.0608.

**3.5 6'-methoxy-2',4-dioxo-2,7-diphenyl-3,4,7,8-tetrahydrospiro[chromene-5,3'-indoline]-6,6(2H)-dicarbonitrile(3e)**

Yellow solid. mp 169-171°C ; <sup>1</sup>H NMR (400 MHz, DMSO) δ 11.41 (s, 1H), 7.57 (d, *J* = 7.0 Hz, 2H), 7.53 – 7.38 (m, 10H), 7.04 (d, *J* = 8.3 Hz, 1H), 5.87 (dd, *J* = 14.6, 2.7 Hz, 1H), 4.56 (dd, *J* = 12.2, 4.8 Hz, 1H), 3.50 – 3.41 (m, 1H), 3.23 – 3.13 (m, 1H), 2.95 (dd, *J* = 17.5, 14.9 Hz, 1H), 2.61 (dd, *J* = 17.6, 3.0 Hz, 1H); <sup>13</sup>C NMR (100 MHz, DMSO) δ 188.27, 174.35, 173.00, 141.91, 137.44, 134.88, 129.87, 129.46, 129.31, 129.04, 128.84, 128.71, 128.57, 126.83, 125.93, 124.57, 112.10, 111.97, 111.62, 109.49, 80.21, 52.89, 47.33, 41.76, 30.44; IR (KBr) *v*/cm<sup>-1</sup>: 3482, 1727, 1675; HRMS (ESI) calcd for C<sub>30</sub>H<sub>19</sub>N<sub>3</sub>O<sub>3</sub>Cl (M-H)<sup>-</sup>: 504.1115, found: 504.1111.

**3.6 1'-methyl-2',4-dioxo-2,7-diphenyl-3,4,7,8-tetrahydrospiro[chromene-5,3'-indoline]-6,6(2H)-dicarbonitrile(3f)**

Yellow solid. mp 140-142°C ; <sup>1</sup>H NMR (400 MHz, CDCl<sub>3</sub>) δ 7.60 – 7.37 (m, 12H), 7.16 (td, *J* = 7.7, 0.8 Hz, 1H), 7.00 (d, *J* = 7.8 Hz, 1H), 5.48 (dd, *J* = 15.0, 3.1 Hz, 1H), 4.78 (dd, *J* = 12.5, 4.9 Hz, 1H), 3.41 (dd, *J* = 19.3, 12.5 Hz, 1H), 3.00 (dd, *J* = 19.3, 4.9 Hz, 1H), 2.86 (dd, *J* = 17.8, 15.0 Hz, 1H), 2.56 (dd, *J* = 17.8, 3.2 Hz, 1H); <sup>13</sup>C NMR (100 MHz, CDCl<sub>3</sub>) δ 188.04, 173.44, 173.00, 144.43, 136.85, 134.68, 130.36, 129.56, 129.35, 129.25, 129.01, 128.77, 126.75, 126.31, 124.15, 123.27, 112.42, 111.48, 110.93, 109.14, 81.06, 53.11, 47.80, 42.80, 39.17, 31.73, 27.08; IR (KBr) *v*/cm<sup>-1</sup>: 3480, 3061, 2922, 1720, 1678; IR (KBr) *v*/cm<sup>-1</sup>: 3480, 3061, 2922, 1720, 1678; HRMS (ESI) calcd for C<sub>31</sub>H<sub>22</sub>N<sub>3</sub>O<sub>3</sub> (M-H)<sup>-</sup>: 484.1661, found: 484.1657.

**3.7 1'-benzyl-2',4-dioxo-2,7-diphenyl-3,4,7,8-tetrahydrospiro[chromene-5,3'-indoline]-6,6(2H)-dicarbonitrile(3g)**

White solid. mp 135-137°C ; <sup>1</sup>H NMR (400 MHz, CDCl<sub>3</sub>) δ 7.72 – 7.28 (m, 17H), 7.15 (t, *J* = 7.6 Hz, 1H), 6.81 (d, *J* = 7.8 Hz, 1H), 5.53 (dd, *J* = 14.9, 2.8 Hz, 1H), 5.20 (d, *J* = 16.1 Hz, 1H), 5.02 (d, *J* = 16.1 Hz, 1H), 4.86 (dd, *J* = 12.4, 4.8 Hz, 1H), 3.47 (dd, *J* = 19.3, 12.4 Hz, 1H), 3.05 (dd, *J* = 19.3, 4.9 Hz, 1H), 2.95 (dd, *J* = 17.7, 15.1 Hz, 1H), 2.63 (dd, *J* = 17.8, 3.0 Hz, 1H); <sup>13</sup>C NMR (100 MHz, CDCl<sub>3</sub>) δ 187.97, 173.84, 173.03, 143.85, 136.85, 134.86, 134.68, 130.24, 129.59, 129.38, 129.28, 129.03, 128.82, 127.64, 127.21, 126.74, 126.38, 124.17, 123.33, 112.45, 111.71, 111.18, 110.47, 81.11, 53.08, 47.84, 45.21, 42.82, 39.30, 31.81; IR (KBr) *v*/cm<sup>-1</sup>: 3480, 3064, 3033, 2921, 2852, 2250, 1729, 1677; HRMS

(ESI) calcd for  $C_{37}H_{26}N_3O_3$  (M-H) $^-$ : 560.1974, found: 560.1977.

**3.8 2,7-bis(4-methoxyphenyl)-2',4-dioxo-3,4,7,8-tetrahydrospiro[chromene-5,3'-indoline]-6,6(2H)-dicarbonitrile(3h)**

Yellow solid. mp 191-194 °C ;  $^1H$  NMR (400 MHz,  $CDCl_3$ )  $\delta$  8.43 (br, 1H), 7.43 (ddd,  $J = 25.7, 21.0, 7.7$  Hz, 6H), 7.14 (t,  $J = 7.6$  Hz, 1H), 7.04 – 6.86 (m, 5H), 5.46 (dd,  $J = 15.0, 2.7$  Hz, 1H), 4.68 (dd,  $J = 12.3, 4.7$  Hz, 1H), 3.84 (s, 3H), 3.82 (s, 3H), 3.37 (dd,  $J = 19.4, 12.5$  Hz, 1H), 3.07 – 2.86 (m, 2H), 2.59 (dd,  $J = 17.9, 2.9$  Hz, 1H);  $^{13}C$  NMR (100 MHz,  $CDCl_3$ )  $\delta$  188.83, 174.74, 173.55, 160.44, 160.39, 141.62, 130.24, 129.93, 128.73, 128.14, 127.35, 126.54, 124.44, 123.12, 114.63, 114.36, 112.46, 111.65, 110.95, 110.83, 80.90, 55.38, 55.28, 53.39, 48.11, 42.45, 38.52, 31.93; HRMS (ESI) calcd for  $C_{32}H_{24}N_3O_5$  (M-H) $^-$ : 530.1716, found: 530.1718.

**3.9 2,7-bis(4-chlorophenyl)-2',4-dioxo-3,4,7,8-tetrahydrospiro[chromene-5,3'-indoline]-6,6(2H)-dicarbonitrile(3i)**

Yellow solid. mp 191-194°C ;  $^1H$  NMR (400 MHz,  $CDCl_3$ )  $\delta$  8.45 (s, 1H), 7.51 (d,  $J = 7.6$  Hz, 1H), 7.49 – 7.27 (m, 9H), 7.13 (t,  $J = 7.6$  Hz, 1H), 6.91 (d,  $J = 7.8$  Hz, 1H), 5.48 (dd,  $J = 14.8, 2.9$  Hz, 1H), 4.71 (dd,  $J = 12.4, 4.8$  Hz, 1H), 3.35 (dd,  $J = 19.3, 12.4$  Hz, 1H), 2.99 (dd,  $J = 19.3, 4.9$  Hz, 1H), 2.86 (dd,  $J = 17.8, 15.0$  Hz, 1H), 2.59 (dd,  $J = 17.9, 3.2$  Hz, 1H).  $^{13}C$  NMR (100 MHz,  $CDCl_3$ )  $\delta$  188.12, 174.54, 172.86, 141.57, 135.78, 135.38, 135.14, 132.98, 130.47, 130.07, 129.58, 129.26, 127.74, 126.94, 124.44, 123.29, 112.12, 111.30, 111.20, 110.96, 80.32, 53.28, 47.57, 42.58, 38.58, 31.67; IR(KBr)  $\nu/cm^{-1}$ : 3450,2926,1729,1678;HRMS (ESI) calcd for  $C_{30}H_{18}N_3O_3Cl_2$ (M-H) $^-$ : 538.0725, found: 538.0722.

**3.10 2,7-bis(2-methoxyphenyl)-2',4-dioxo-3,4,7,8-tetrahydrospiro[chromene-5,3'-indoline]-6,6(2H)-dicarbonitrile(3j)**

Yellow solid. mp 244°C, decompose ;  $^1H$  NMR (400 MHz,  $CDCl_3$ )  $\delta$  8.02 (s, 1H), 7.56 (d,  $J = 7.5$  Hz, 2H), 7.47 (d,  $J = 7.5$  Hz, 1H), 7.35 (dd,  $J = 13.1, 6.7$  Hz, 3H), 7.13 (t,  $J = 7.7$  Hz, 1H), 7.06 – 7.00 (m, 2H), 6.99 – 6.88 (m, 3H), 5.85 (dd,  $J = 13.7, 4.2$  Hz, 1H), 5.47 (dd,  $J = 12.5, 4.6$  Hz, 1H), 3.86 (s, 3H), 3.85 (s, 3H), 3.36 (dd,  $J = 19.0, 12.6$  Hz, 1H), 2.93 (dd,  $J = 19.2, 4.7$  Hz, 1H), 2.71 (m, 2H);  $^{13}C$  NMR (100 MHz,  $CDCl_3$ )  $\delta$  189.09, 174.45, 173.90, 157.78, 155.89, 141.55, 130.34, 130.11, 129.92, 127.51, 126.51, 125.70, 124.66, 123.27, 123.00, 120.94, 112.68, 111.67, 111.29, 110.99, 110.64, 110.46, 76.22, 55.57, 55.35, 53.51, 47.17, 41.89,31.38; IR (KBr)  $\nu/cm^{-1}$ : 3479,3414,2357,1732,1637,1618;HRMS (ESI) calcd for  $C_{32}H_{24}N_3O_5$  (M-H) $^-$ : 530.1716, found: 530.1716.

**3.11 2,7-bis(2-chlorophenyl)-2',4-dioxo-3,4,7,8-tetrahydrospiro[chromene-5,3'-indoline]-6,6(2H)-dicarbonitrile(3k)**

Yellow solid. mp 206-209°C ;  $^1H$  NMR (400 MHz,  $CDCl_3$ )  $\delta$  8.29 (s, 1H), 7.77 (d,  $J = 7.5$  Hz, 1H), 7.65 – 7.32 (m, 9H), 7.17 (t,  $J = 7.7$  Hz, 1H), 6.98 (d,  $J = 7.8$  Hz, 1H), 5.93 (dd,  $J = 13.2, 4.7$  Hz, 1H), 5.63 (dd,  $J = 12.3, 4.9$  Hz, 1H), 3.34 (dd,  $J = 19.2, 12.3$  Hz, 1H), 3.06 (dd,  $J = 19.2, 4.9$  Hz, 1H), 2.86 – 2.69 (m, 2H);  $^{13}C$  NMR (100 MHz,  $CDCl_3$ )  $\delta$  187.95, 174.07, 172.80, 141.63, 135.74, 134.92, 132.62, 131.76, 130.72, 130.49, 130.44, 130.14, 129.88, 127.98, 127.72, 127.58, 127.21, 126.82, 124.61, 123.21, 112.42, 111.38, 110.90, 110.83, 77.91, 53.35, 46.59, 41.65, 34.38, 32.03; HRMS (ESI) calcd for  $C_{30}H_{18}N_3O_3Cl_2$  (M-H) $^-$ : 538.0725, found: 538.0725.

**3.12 2,7-bis(2,6-dimethoxyphenyl)-2',4-dioxo-3,4,7,8-tetrahydrospiro[chromene-5,3'-indolin]-6,6(2H)-dicarbonitrile(3l)**

Yellow solid. mp 175-177°C ;  $^1H$  NMR (400 MHz, DMSO)  $\delta$  11.15 (s, 1H), 7.43 (d,  $J = 7.5$  Hz, 1H), 7.34 (td,  $J = 7.7, 1.0$  Hz, 1H), 7.17 (dd,  $J = 11.1, 2.7$  Hz, 2H), 7.05 (m, 3H), 6.96 (m, 3H), 5.85 (dd,  $J = 14.6, 3.1$  Hz, 1H), 5.26 (dd,  $J = 12.5, 4.7$  Hz, 1H), 3.78 (s, 3H), 3.74 (s, 3H), 3.73 (s, 3H), 3.73 (s, 3H),

3.52 – 3.40 (m, 1H), 3.05 (dd,  $J = 19.4, 4.9$  Hz, 1H), 2.92 (dd,  $J = 17.7, 14.7$  Hz, 1H), 2.52 – 2.49 (m, 1H);  $^{13}\text{C}$  NMR (100 MHz, DMSO)  $\delta$  188.04, 174.17, 173.11, 153.26, 153.15, 151.46, 150.01, 143.00, 129.77, 127.61, 126.16, 124.31, 124.23, 121.78, 114.62, 114.42, 113.84, 113.19, 112.83, 112.71, 112.54, 112.16, 110.01, 109.90, 79.12, 75.30, 56.10, 55.46, 55.37, 52.74, 46.99, 40.96, 30.28; HRMS (ESI) calcd for  $\text{C}_{34}\text{H}_{28}\text{N}_3\text{O}_7$  (M-H) $^-$ : 590.1927, found: 590.1928.

**3.13 2,7-di(furan-2-yl)-2',4-dioxo-3,4,7,8-tetrahydrospiro[chromene-5,3'-indoline]-6,6(2H)-dicarbonitrile(3m)**

Yellow solid. mp 155-157°C;  $^1\text{H}$  NMR (400 MHz,  $\text{CDCl}_3$ )  $\delta$  8.11 (s, 1H), 7.50 (d,  $J = 7.7$  Hz, 3H), 7.36 (d,  $J = 7.2$  Hz, 1H), 7.14 (d,  $J = 7.1$  Hz, 1H), 6.97 (d,  $J = 7.2$  Hz, 1H), 6.63 – 6.33 (m, 4H), 5.52 (dd,  $J = 14.9, 2.1$  Hz, 1H), 4.86 (dd,  $J = 11.9, 5.0$  Hz, 1H), 3.39 (dd,  $J = 19.4, 12.0$  Hz, 1H), 3.14 (dd,  $J = 17.8, 14.9$  Hz, 1H), 2.98 (dd,  $J = 19.4, 5.0$  Hz, 1H), 2.61 (dd,  $J = 17.8, 2.1$  Hz, 1H);  $^{13}\text{C}$  NMR (100 MHz,  $\text{CDCl}_3$ )  $\delta$  187.70, 174.29, 172.19, 148.92, 148.14, 144.01, 143.90, 141.42, 130.38, 126.85, 124.45, 123.28, 111.86, 111.28, 110.82, 110.74, 110.49, 110.37, 73.54, 52.85, 46.16, 39.06, 34.03, 30.56; IR (KBr)  $\nu/\text{cm}^{-1}$ : 3419,2924,1728,1618; HRMS (ESI) calcd for  $\text{C}_{26}\text{H}_{16}\text{N}_3\text{O}_5$  (M-H) $^-$ : 450.1090, found: 450.1091.

**3.14 2',4-dioxo-2,7-di(thiophen-2-yl)-3,4,7,8-tetrahydrospiro[chromene-5,3'-indoline]-6,6(2H)-dicarbonitrile(3n)**

Yellow solid. mp 244°C, decompose;  $^1\text{H}$  NMR (400 MHz, DMSO)  $\delta$  11.25 (s, 1H), 7.72 – 7.56 (m, 2H), 7.44 (d,  $J = 7.5$  Hz, 1H), 7.39 – 7.28 (m, 3H), 7.18 – 6.96 (m, 4H), 6.02 (dd,  $J = 14.5, 3.1$  Hz, 1H), 4.86 (dd,  $J = 11.7, 5.3$  Hz, 1H), 3.32 – 3.16 (m, 2H), 3.01 (dd,  $J = 17.7, 14.6$  Hz, 1H), 2.71 (dd,  $J = 17.7, 3.2$  Hz, 1H);  $^{13}\text{C}$  NMR (100 MHz, DMSO)  $\delta$  187.53, 174.47, 171.54, 142.92, 139.37, 137.18, 129.95, 128.13, 127.50, 127.44, 127.30, 127.07, 127.04, 124.32, 121.97, 112.15, 112.10, 110.22, 75.56, 52.61, 48.30, 41.98, 34.78, 32.53; IR (KBr)  $\nu/\text{cm}^{-1}$ : 3478,2924,2354,1728,1670,1618; HRMS (ESI) calcd for  $\text{C}_{26}\text{H}_{16}\text{N}_3\text{O}_3\text{S}_2$  (M-H) $^-$ : 482.0633, found: 482.0636.

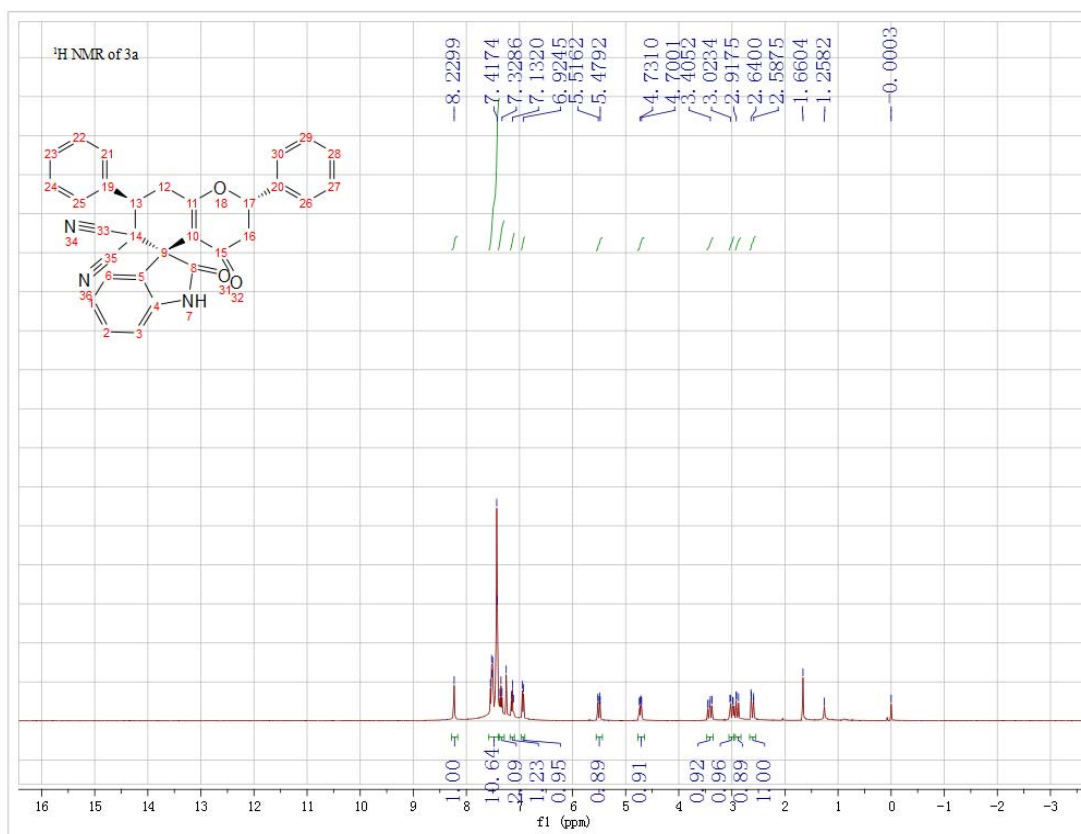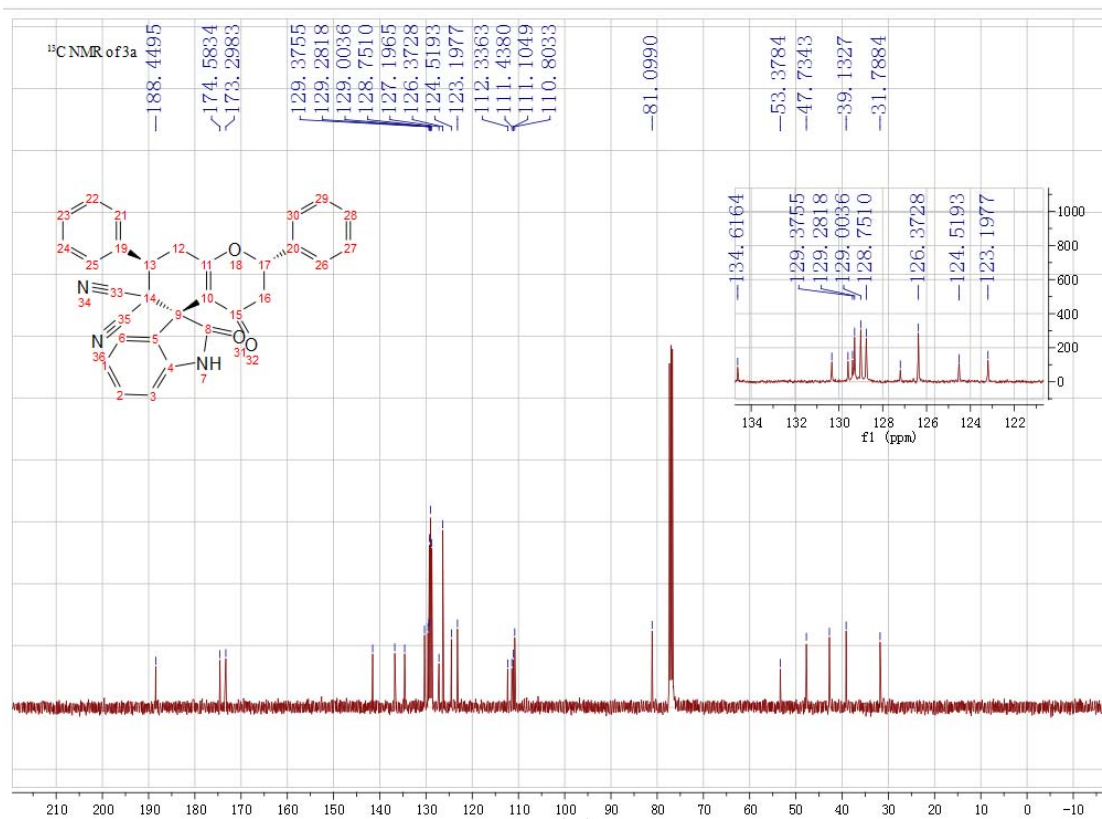



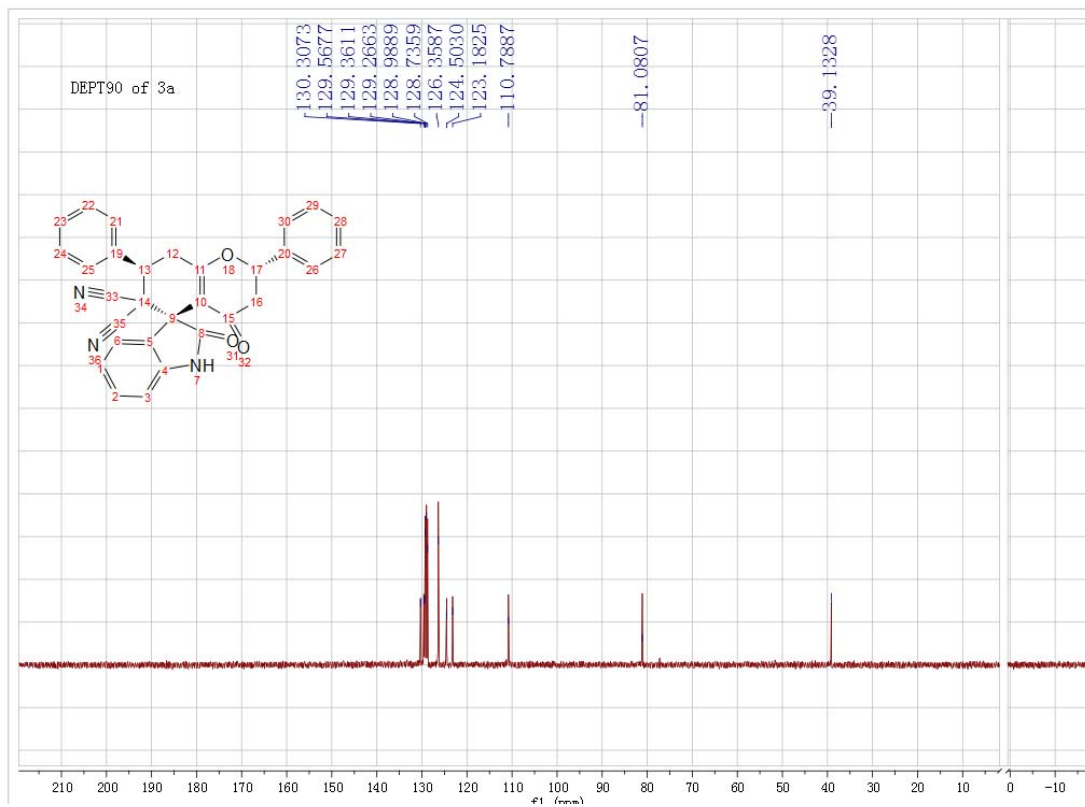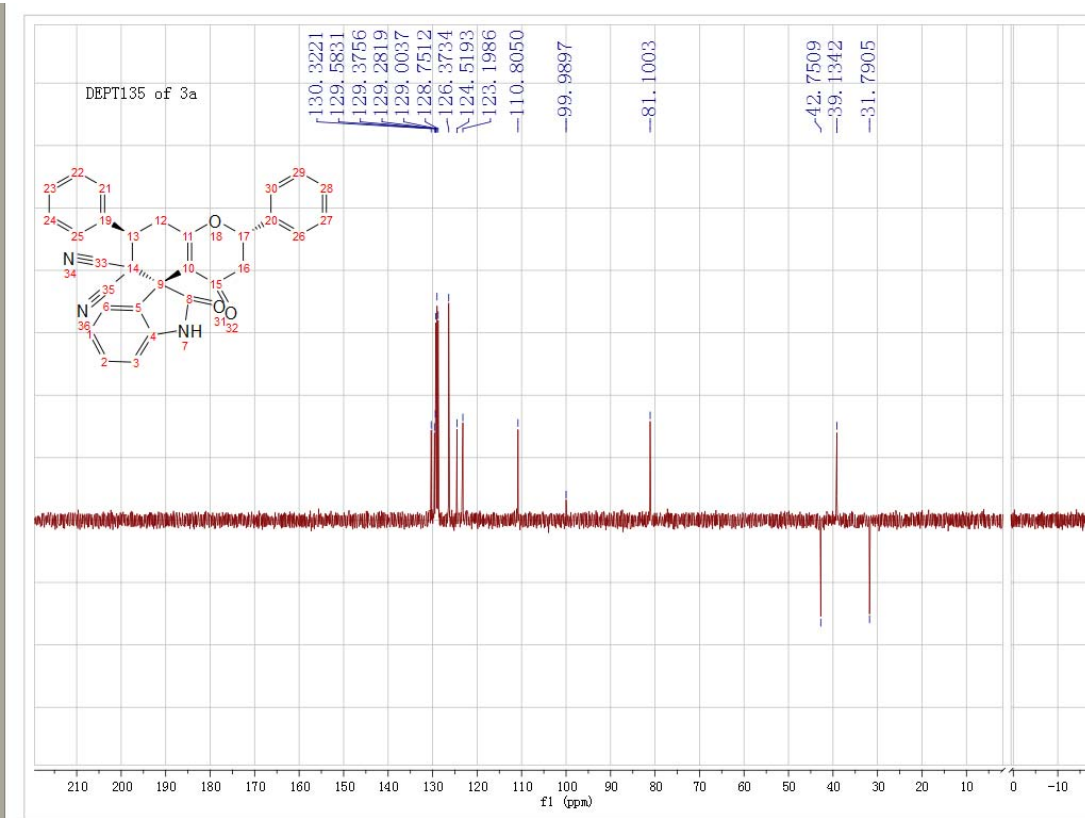

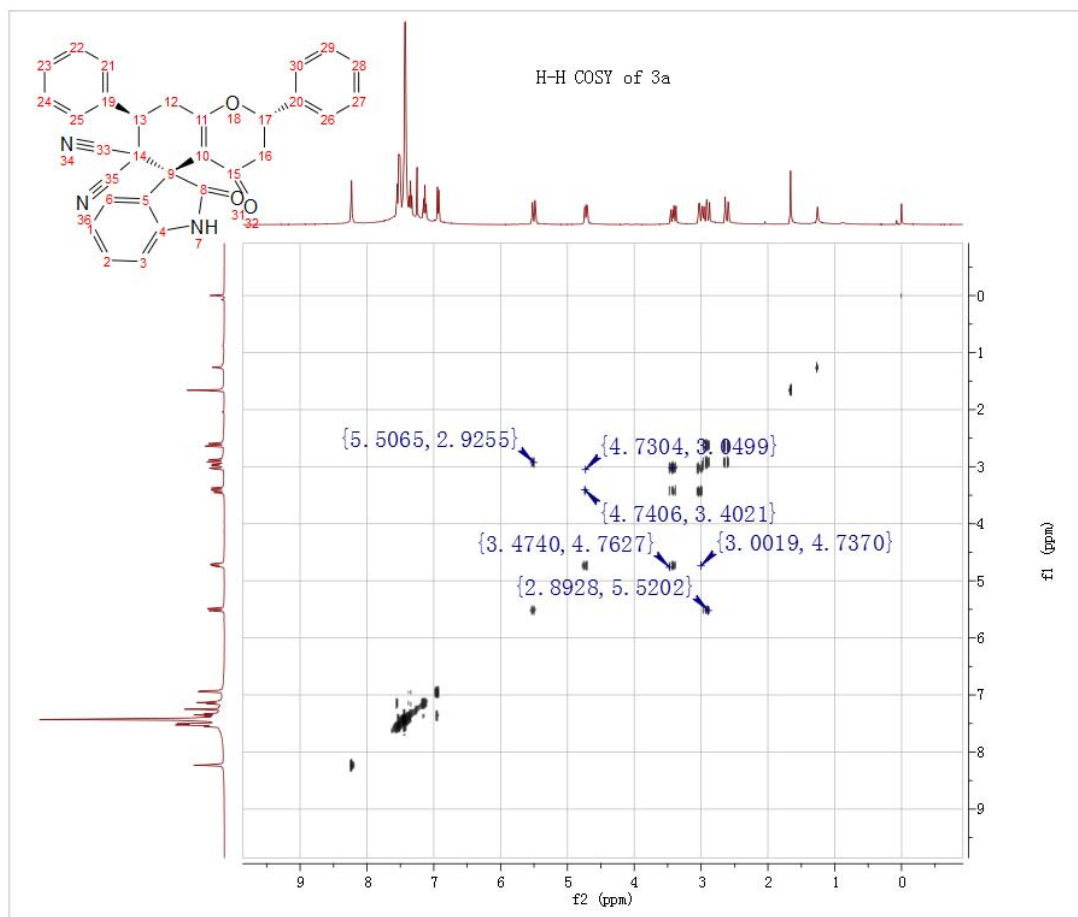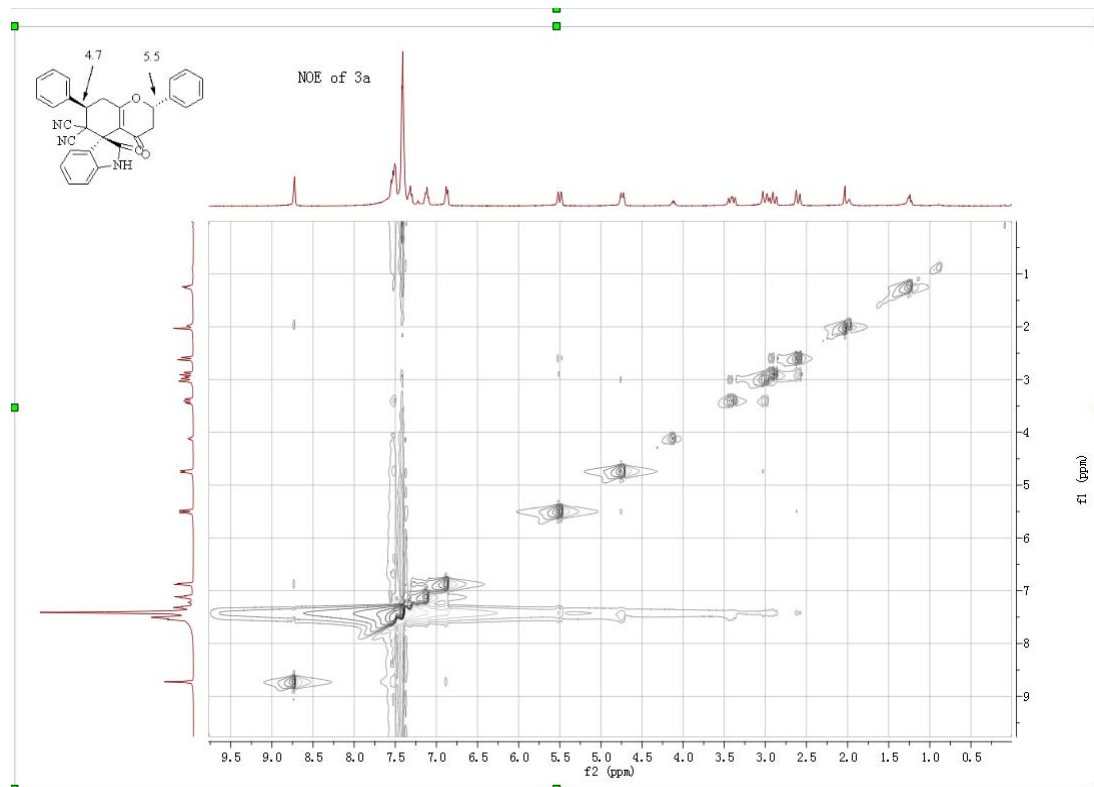

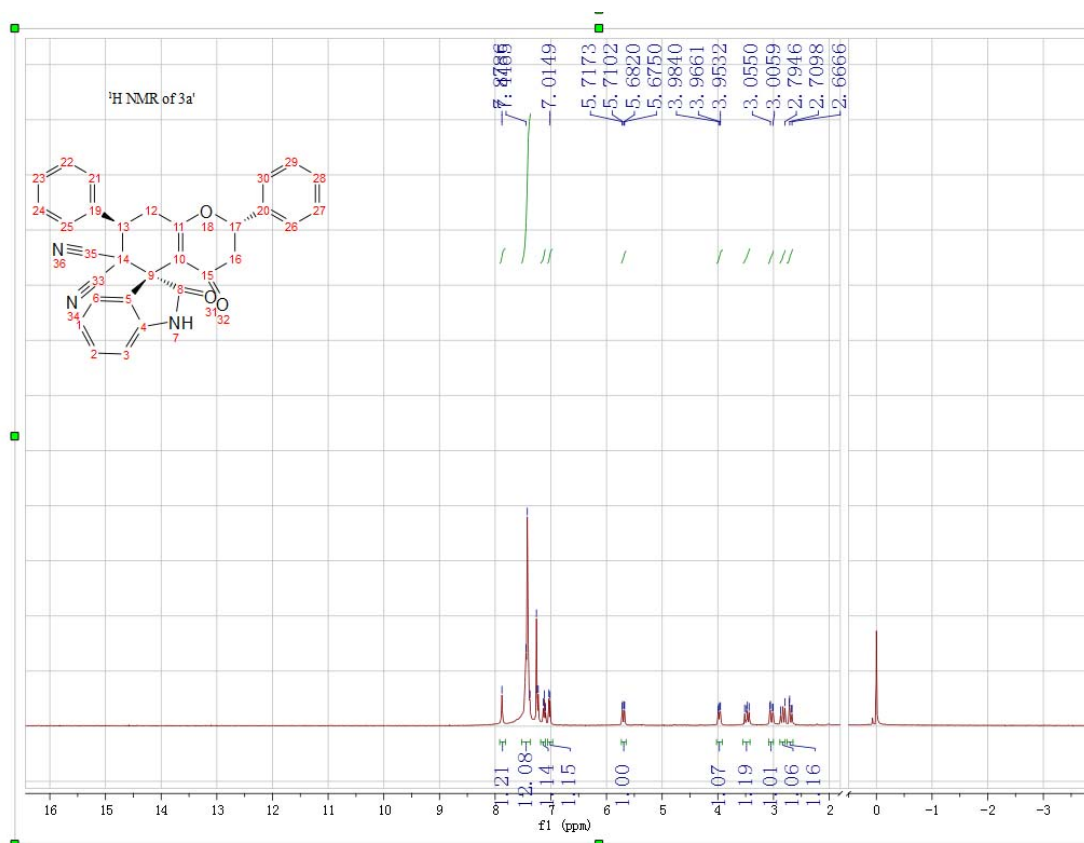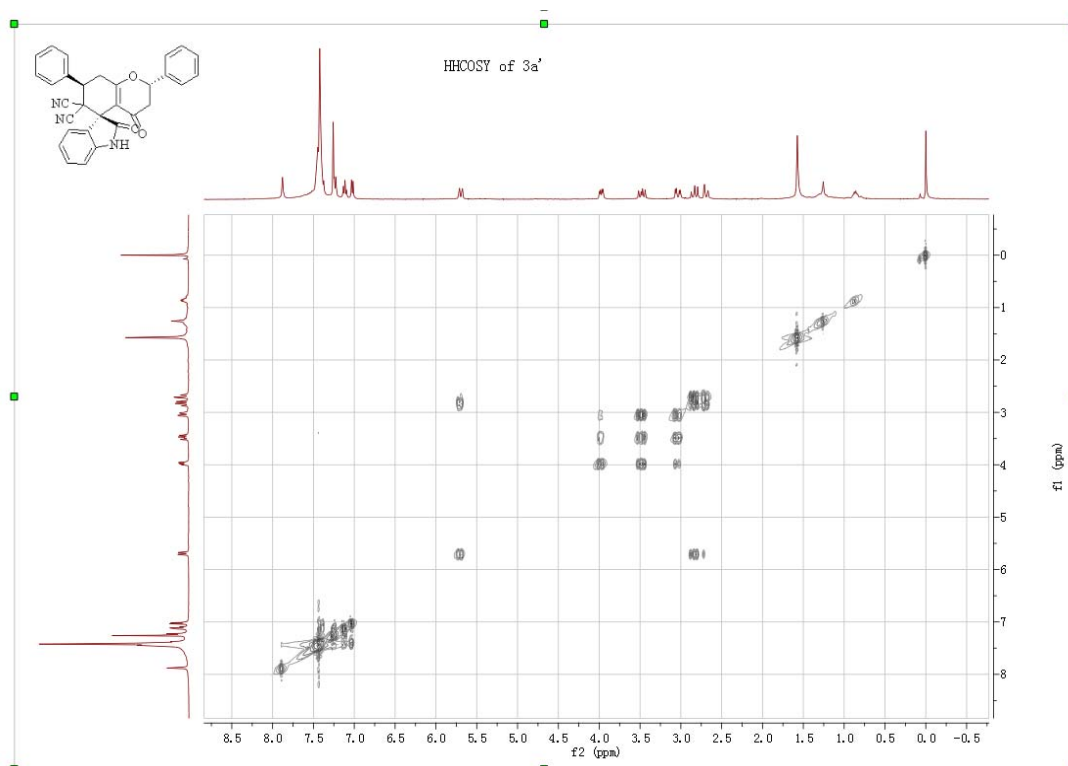

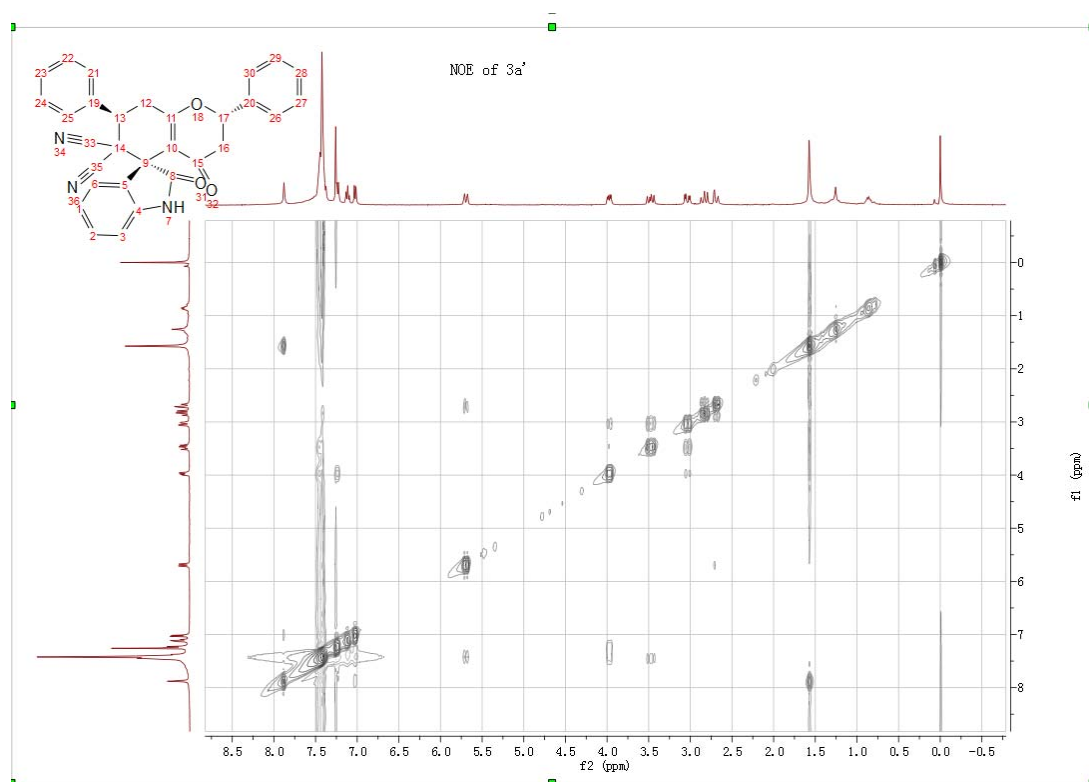

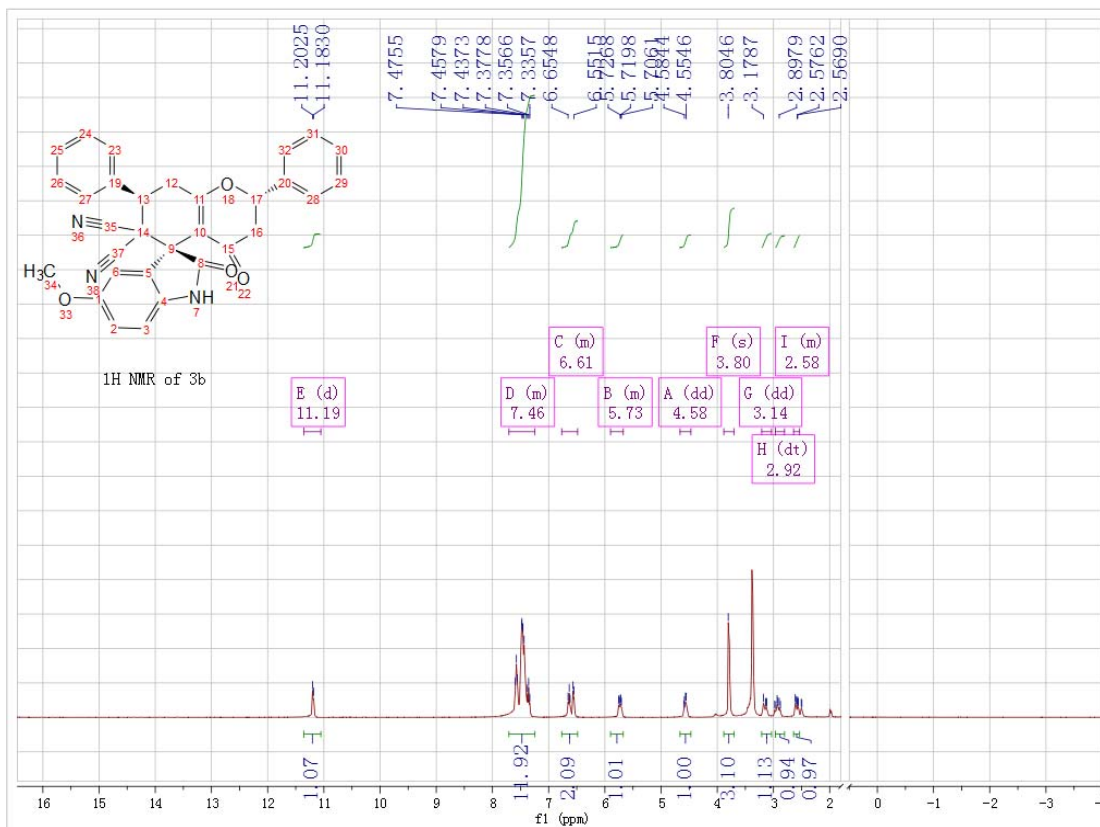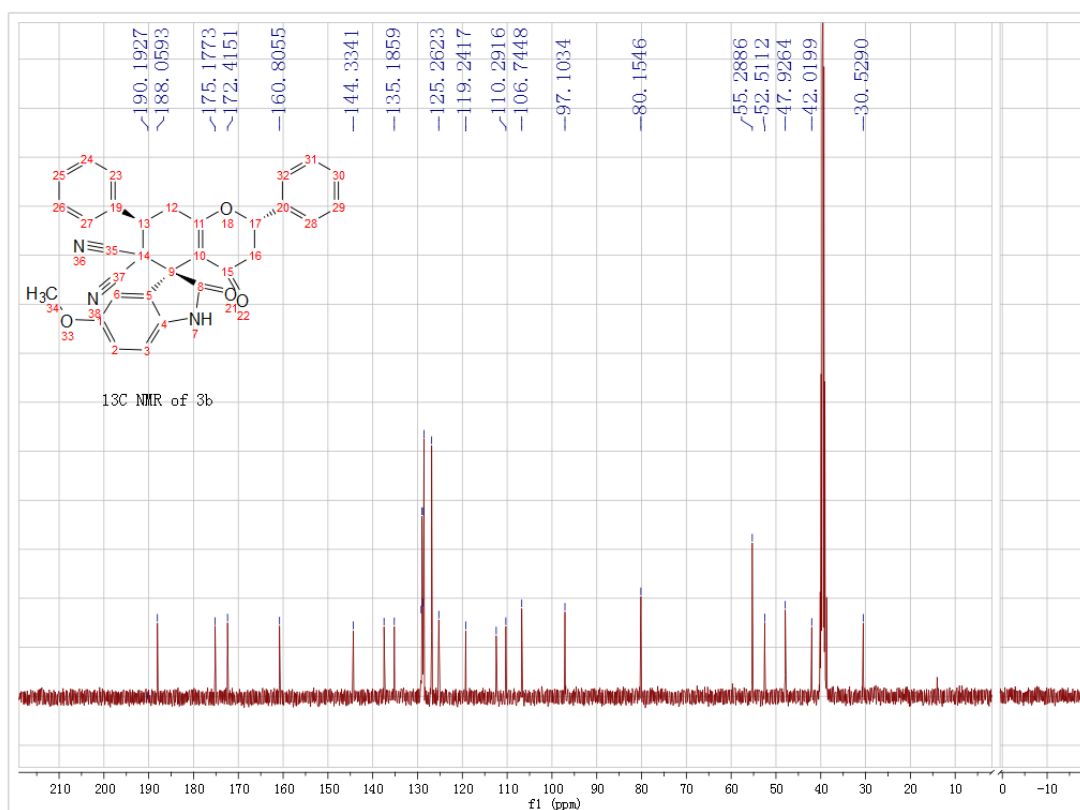

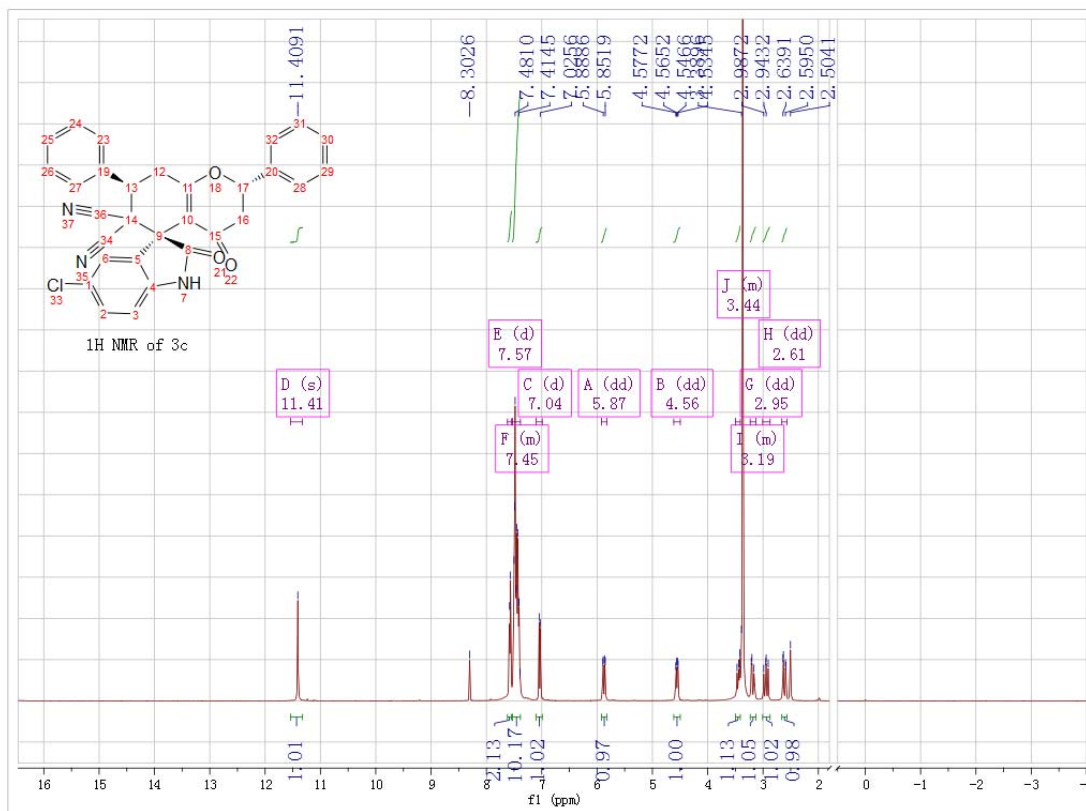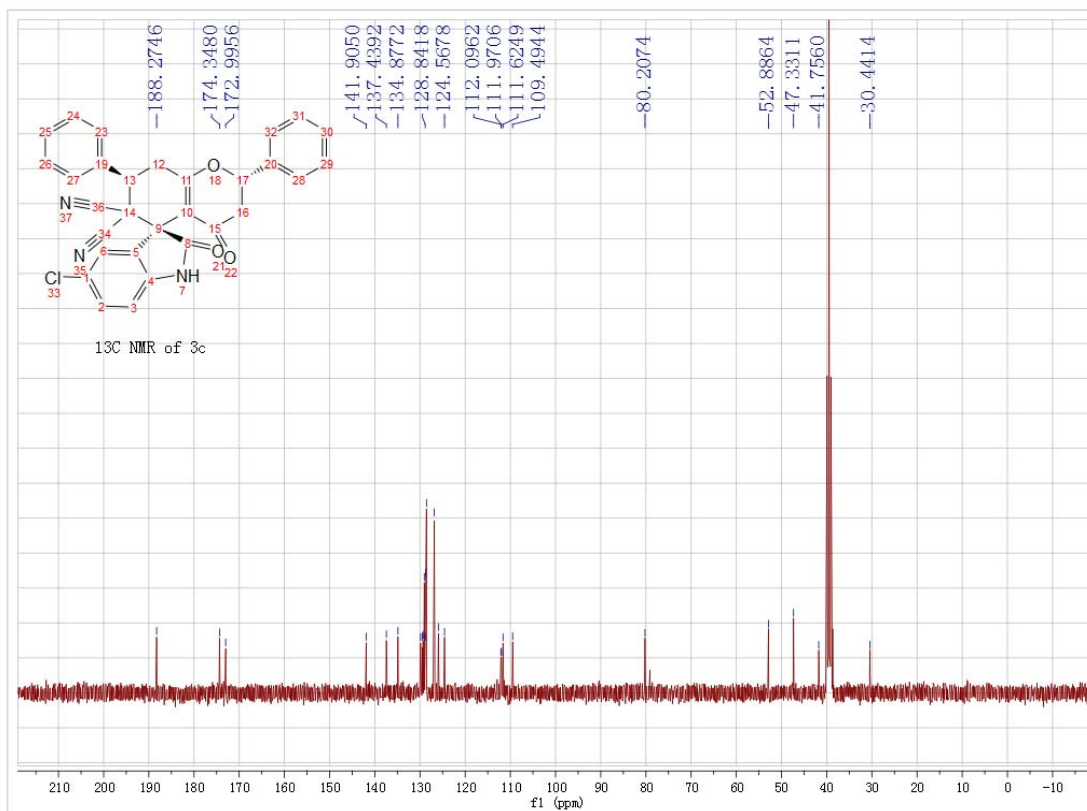

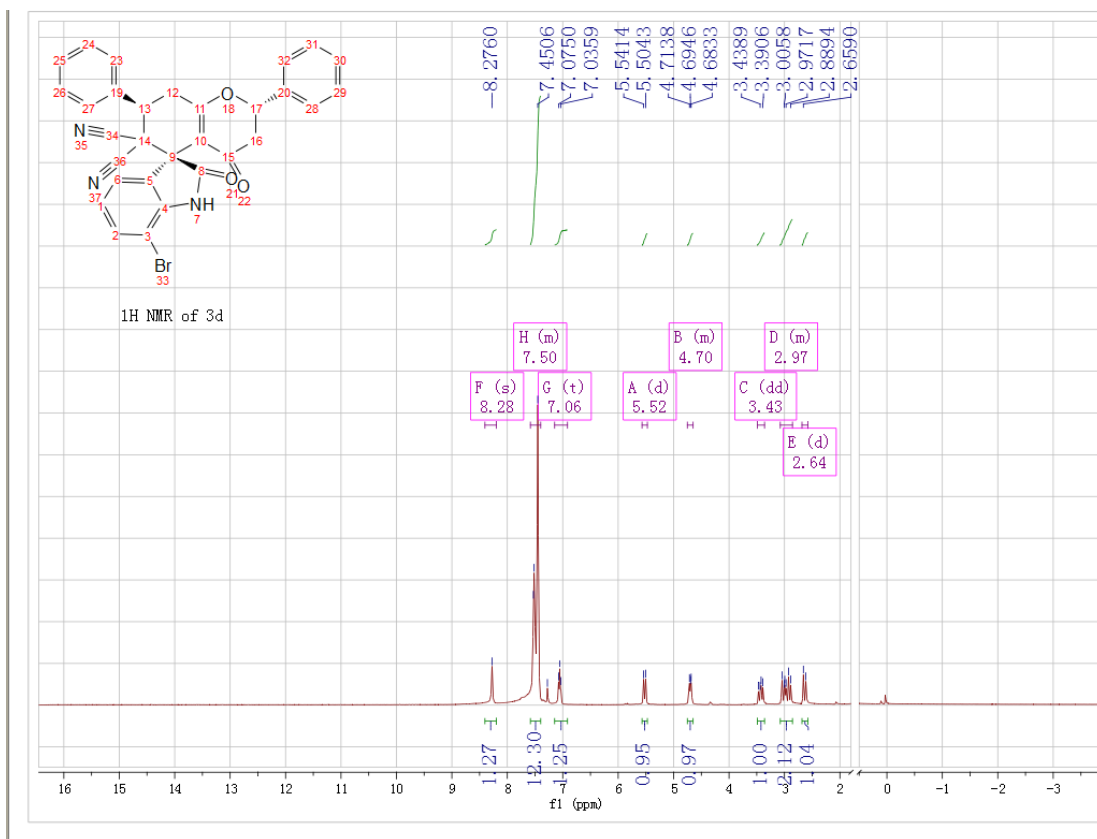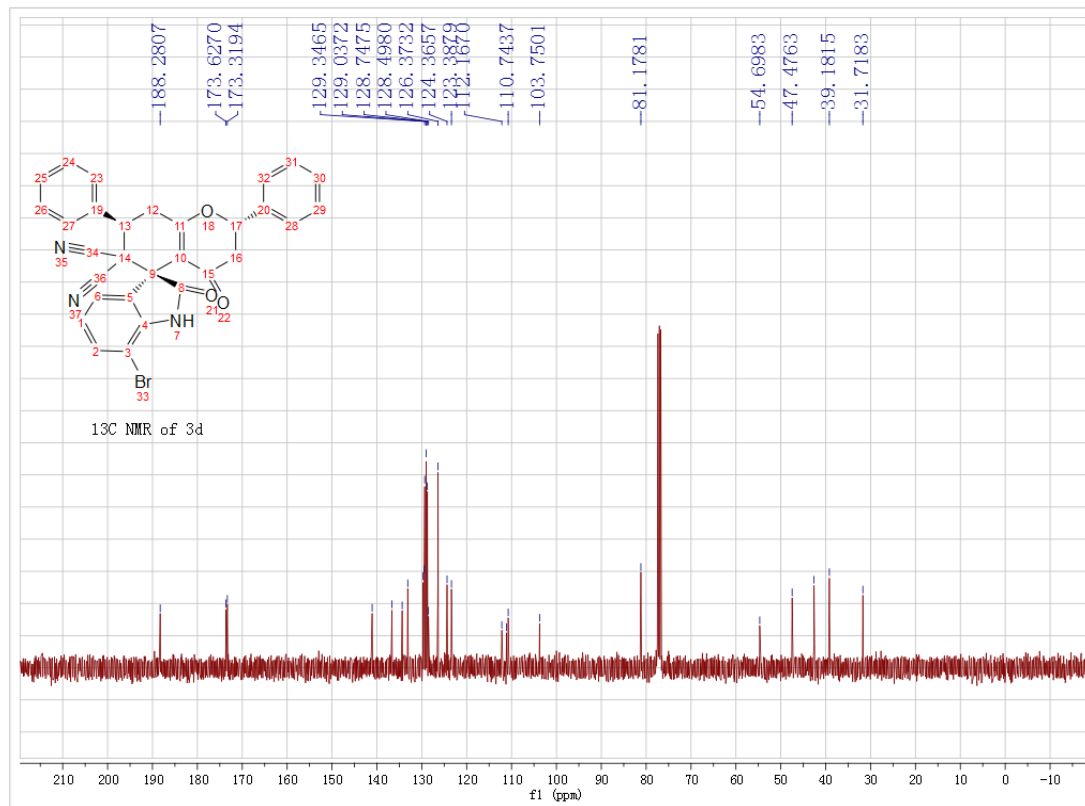

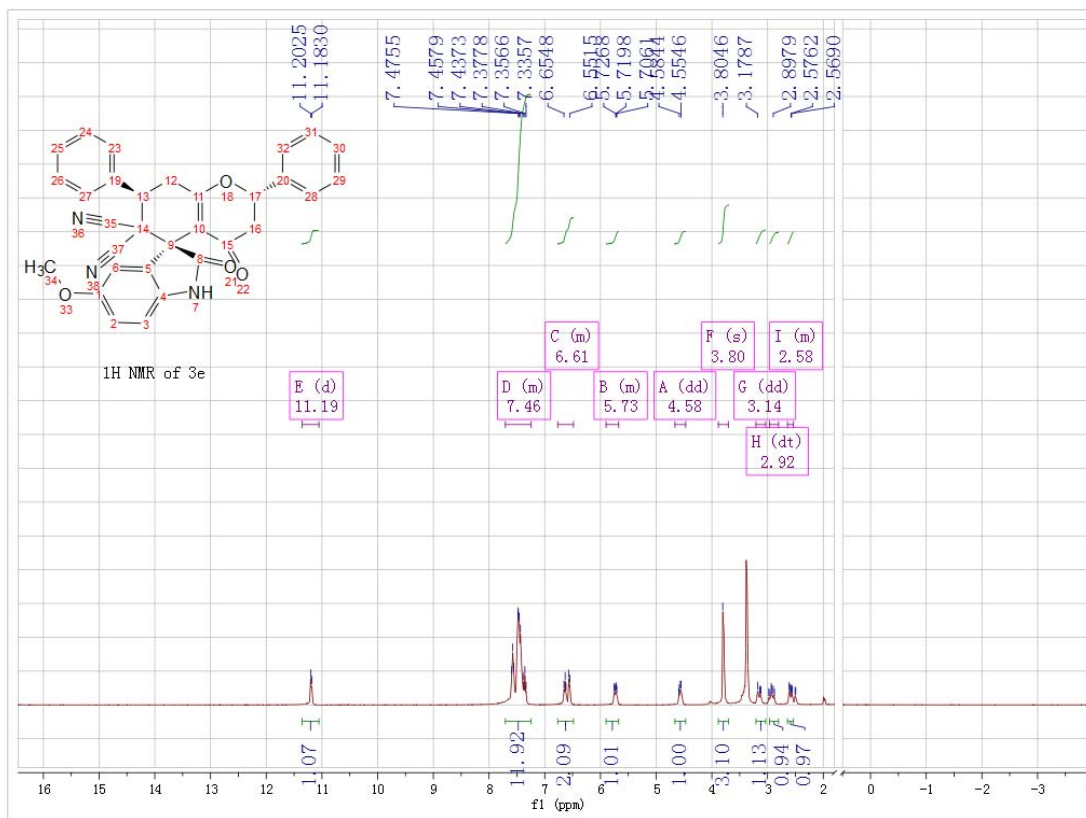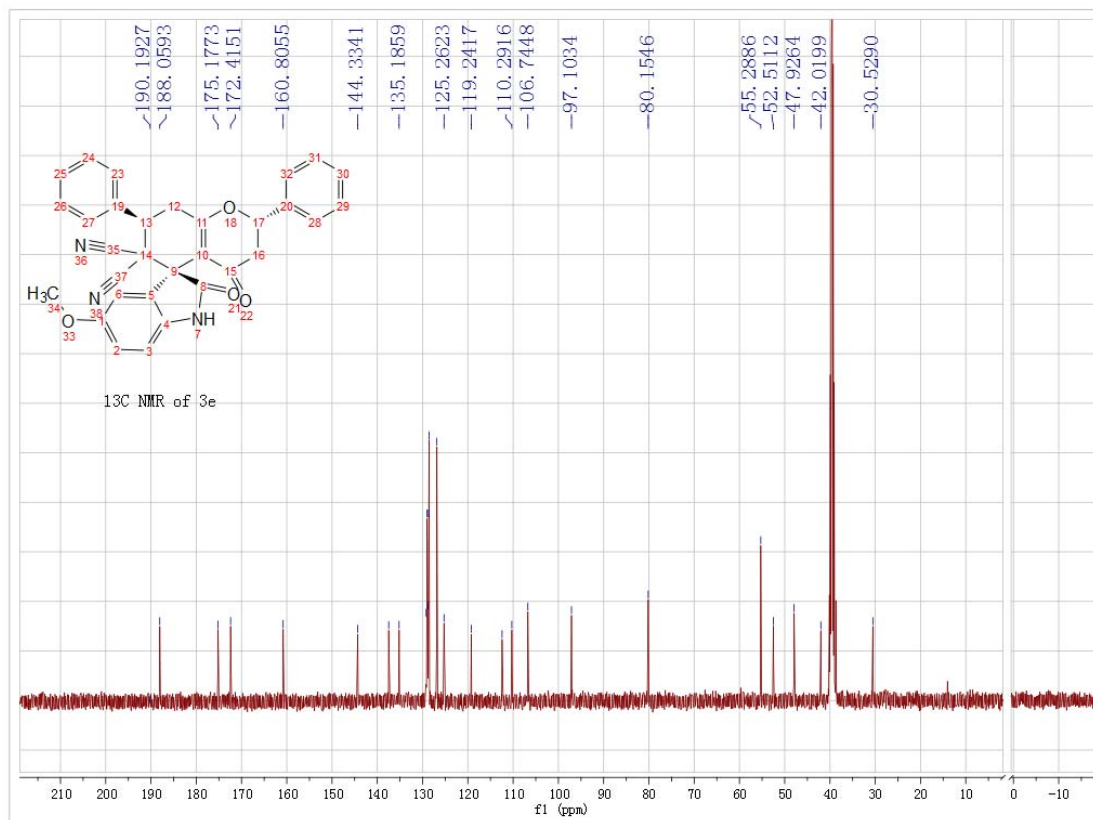



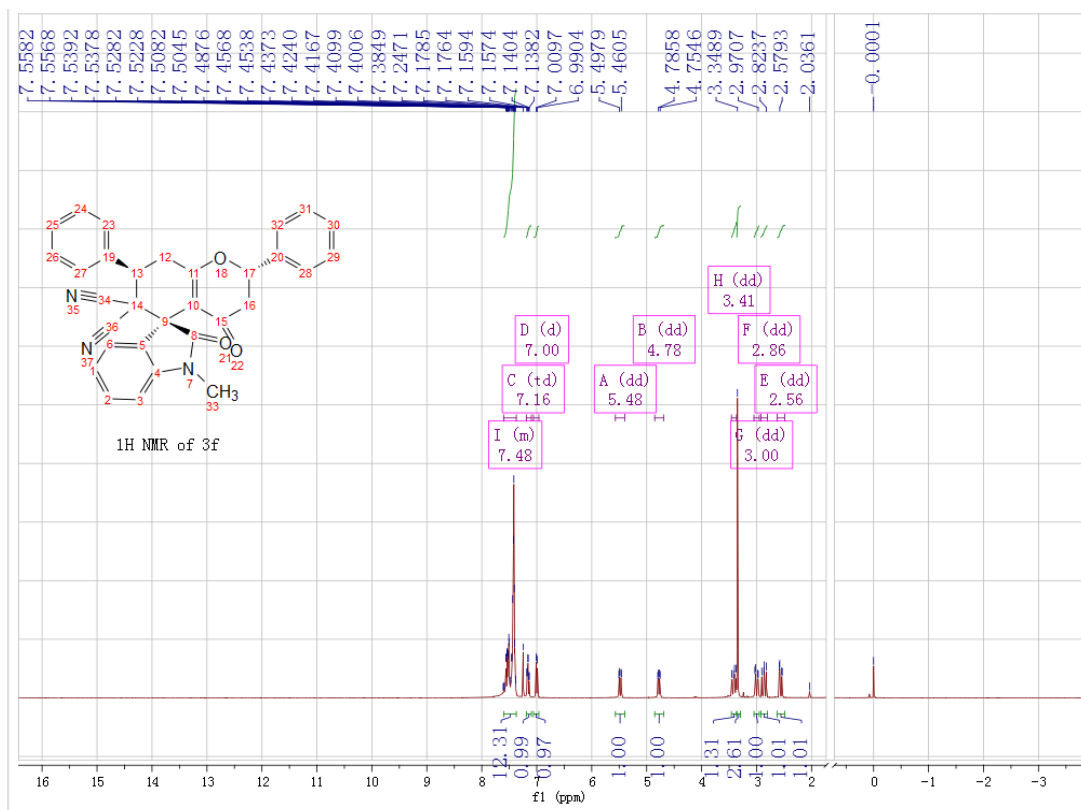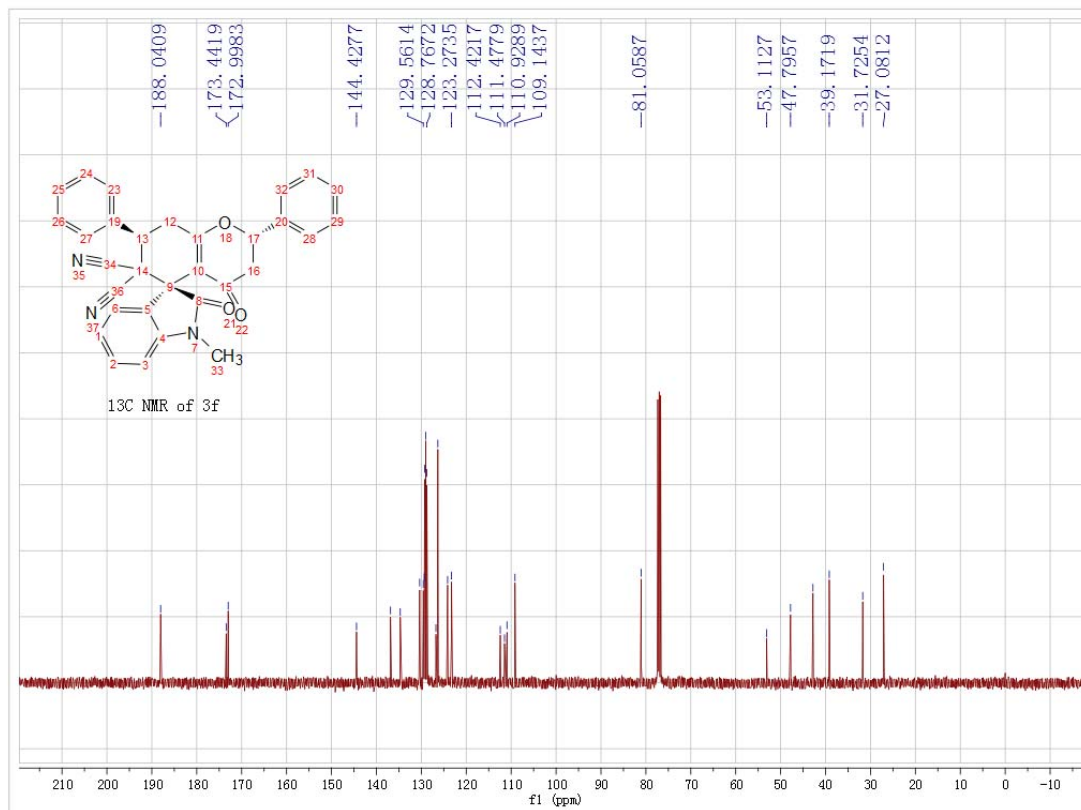

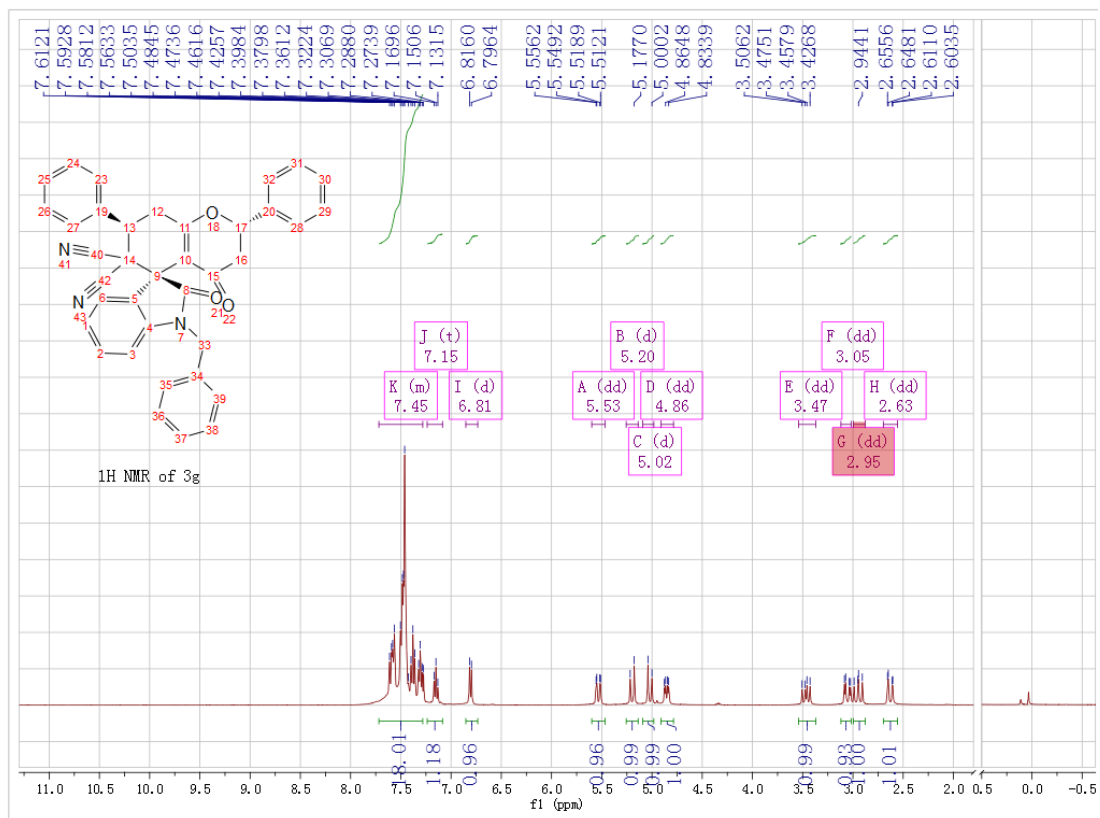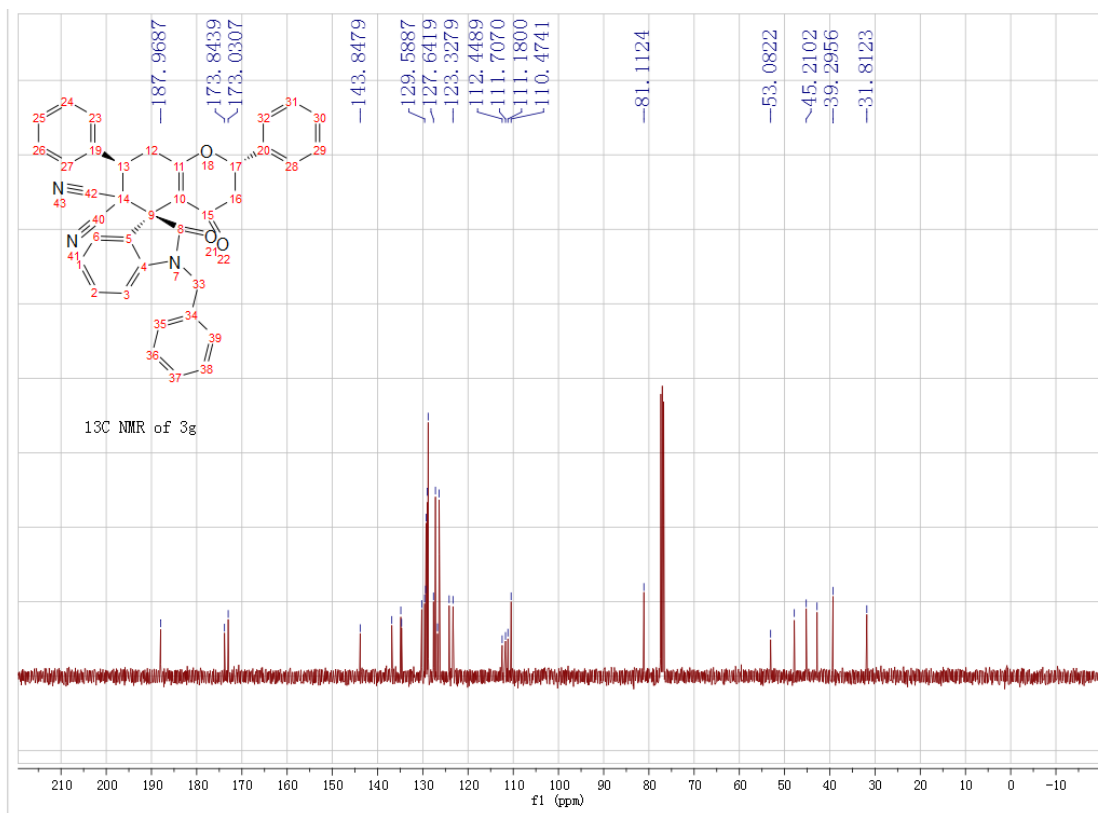

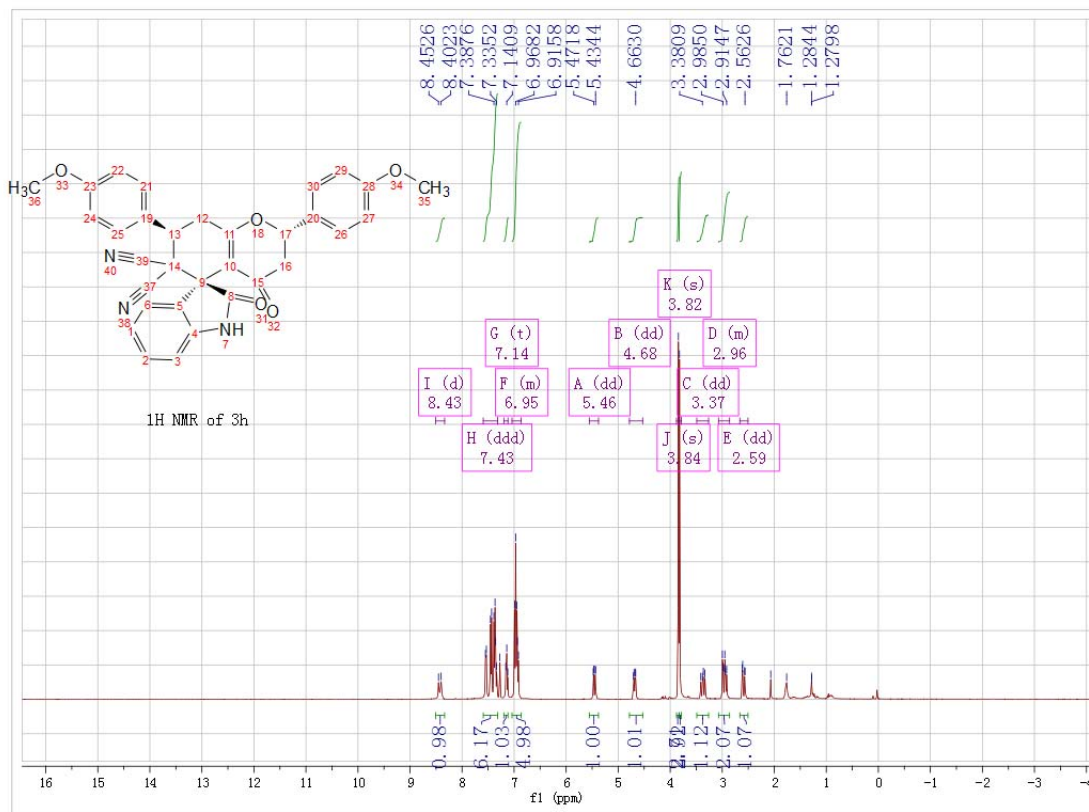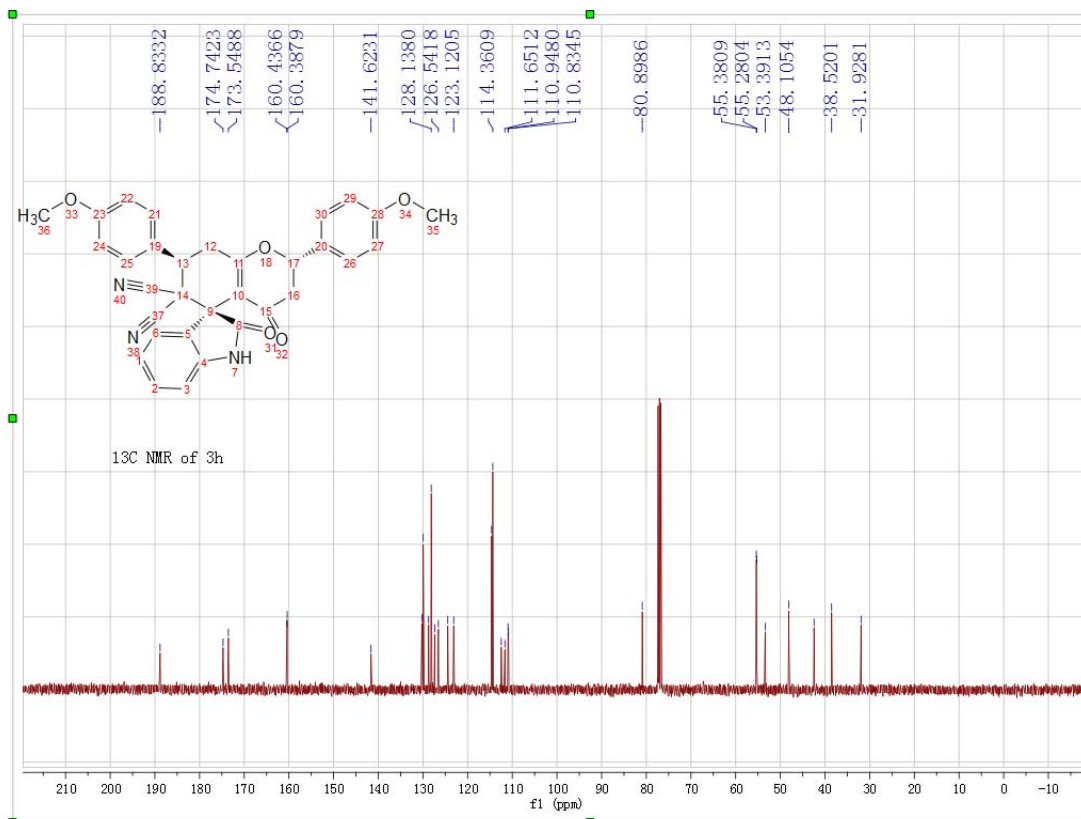

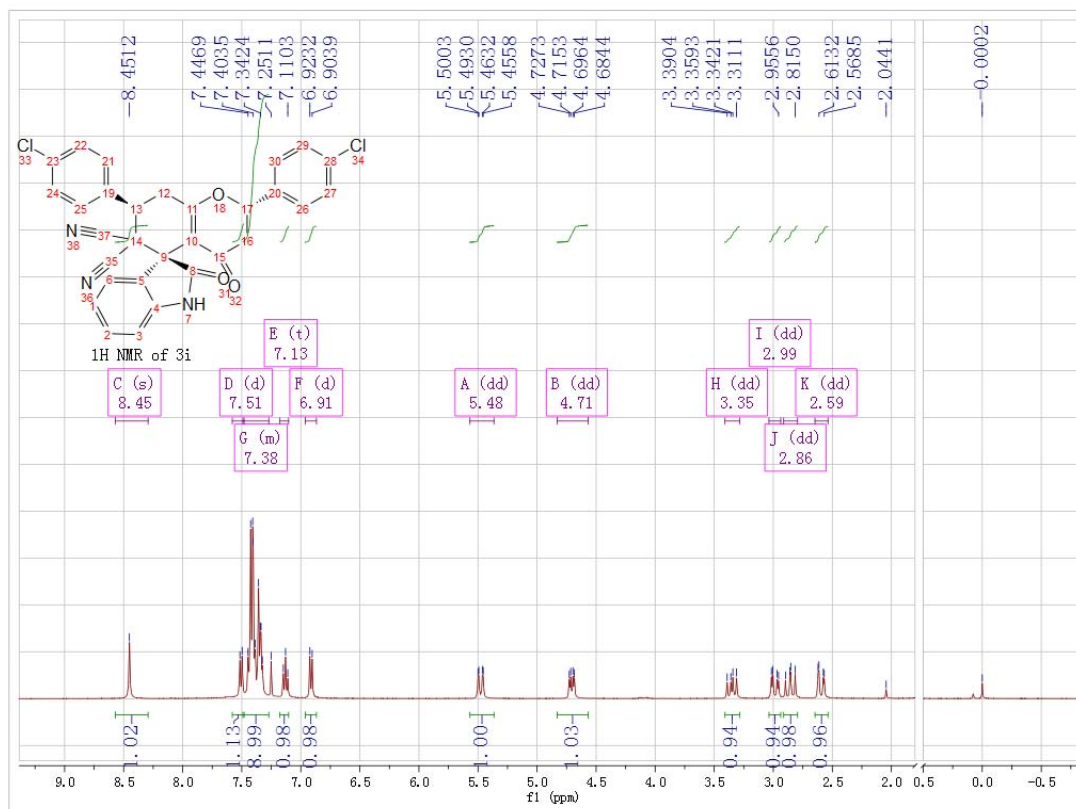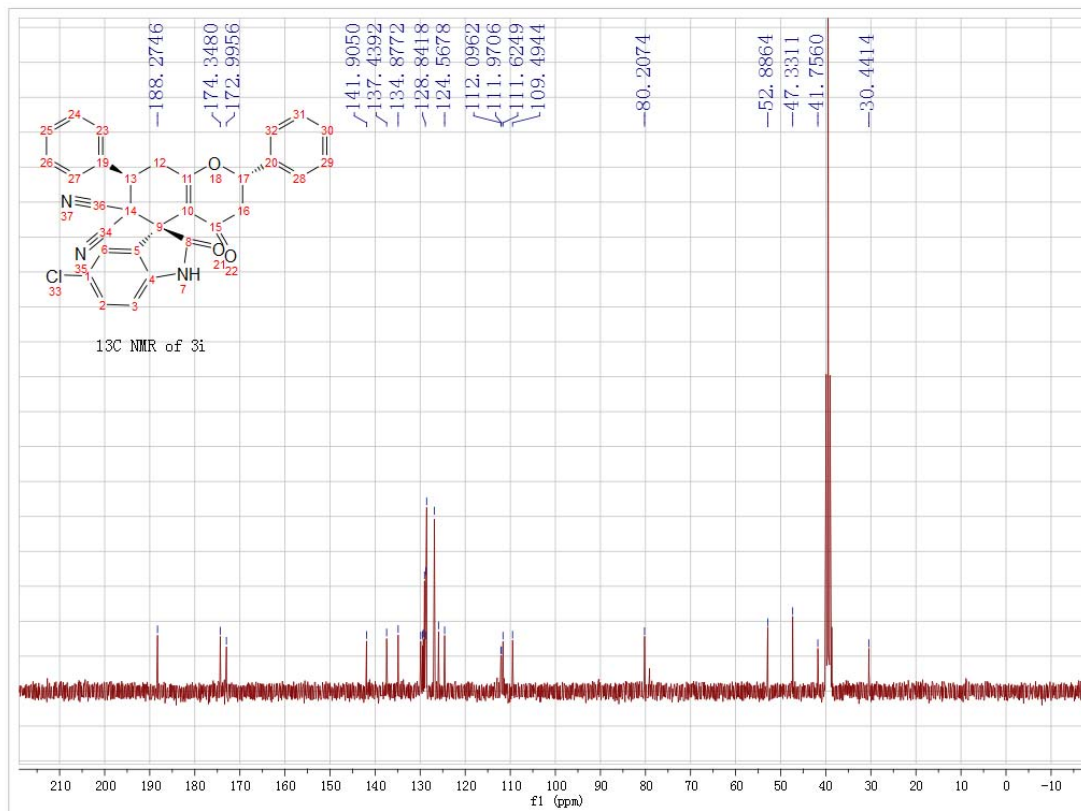

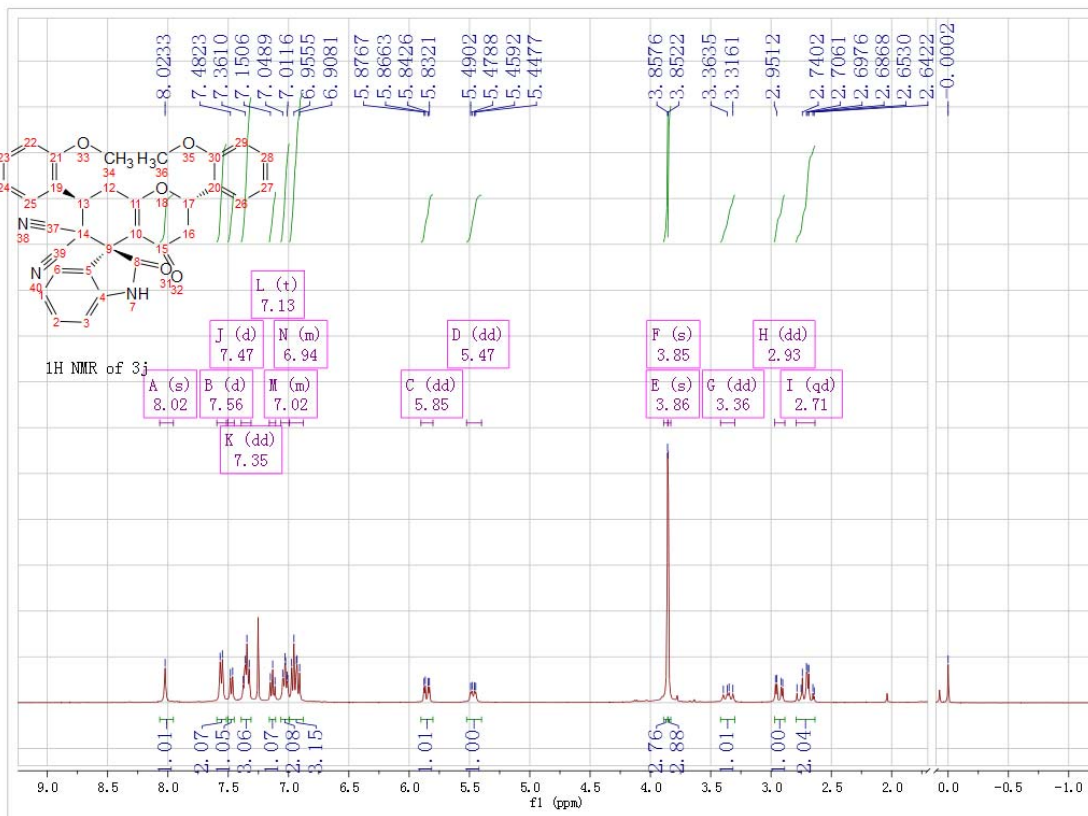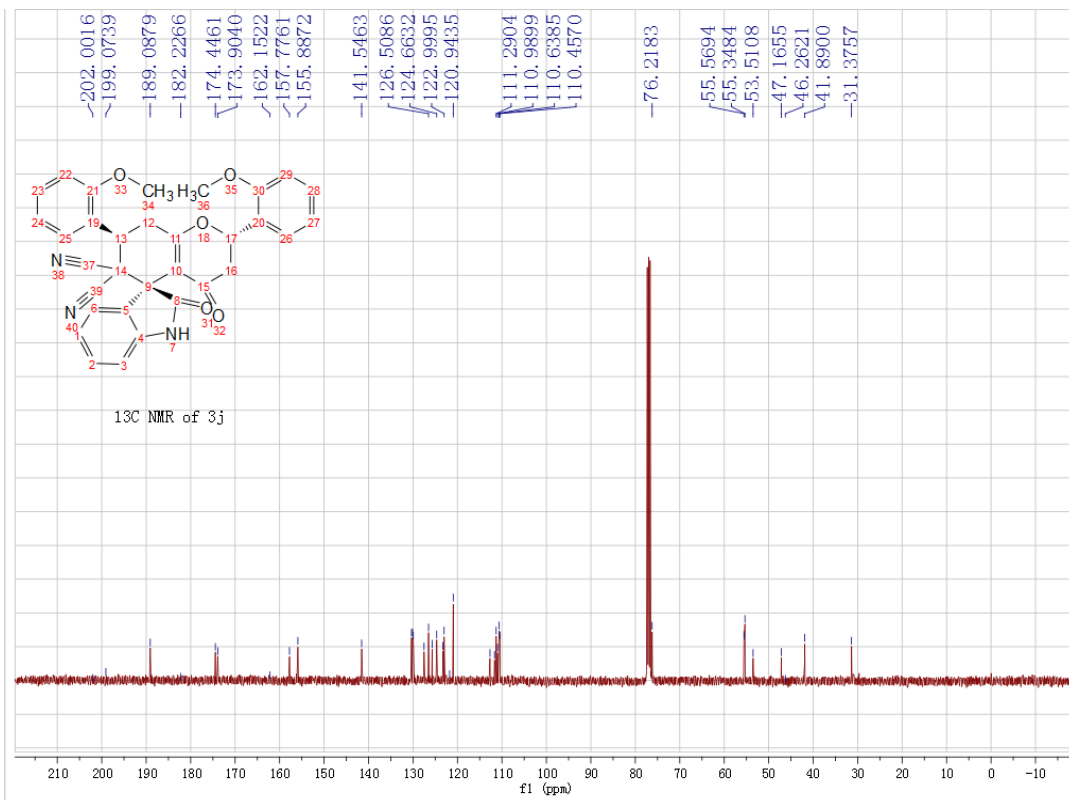

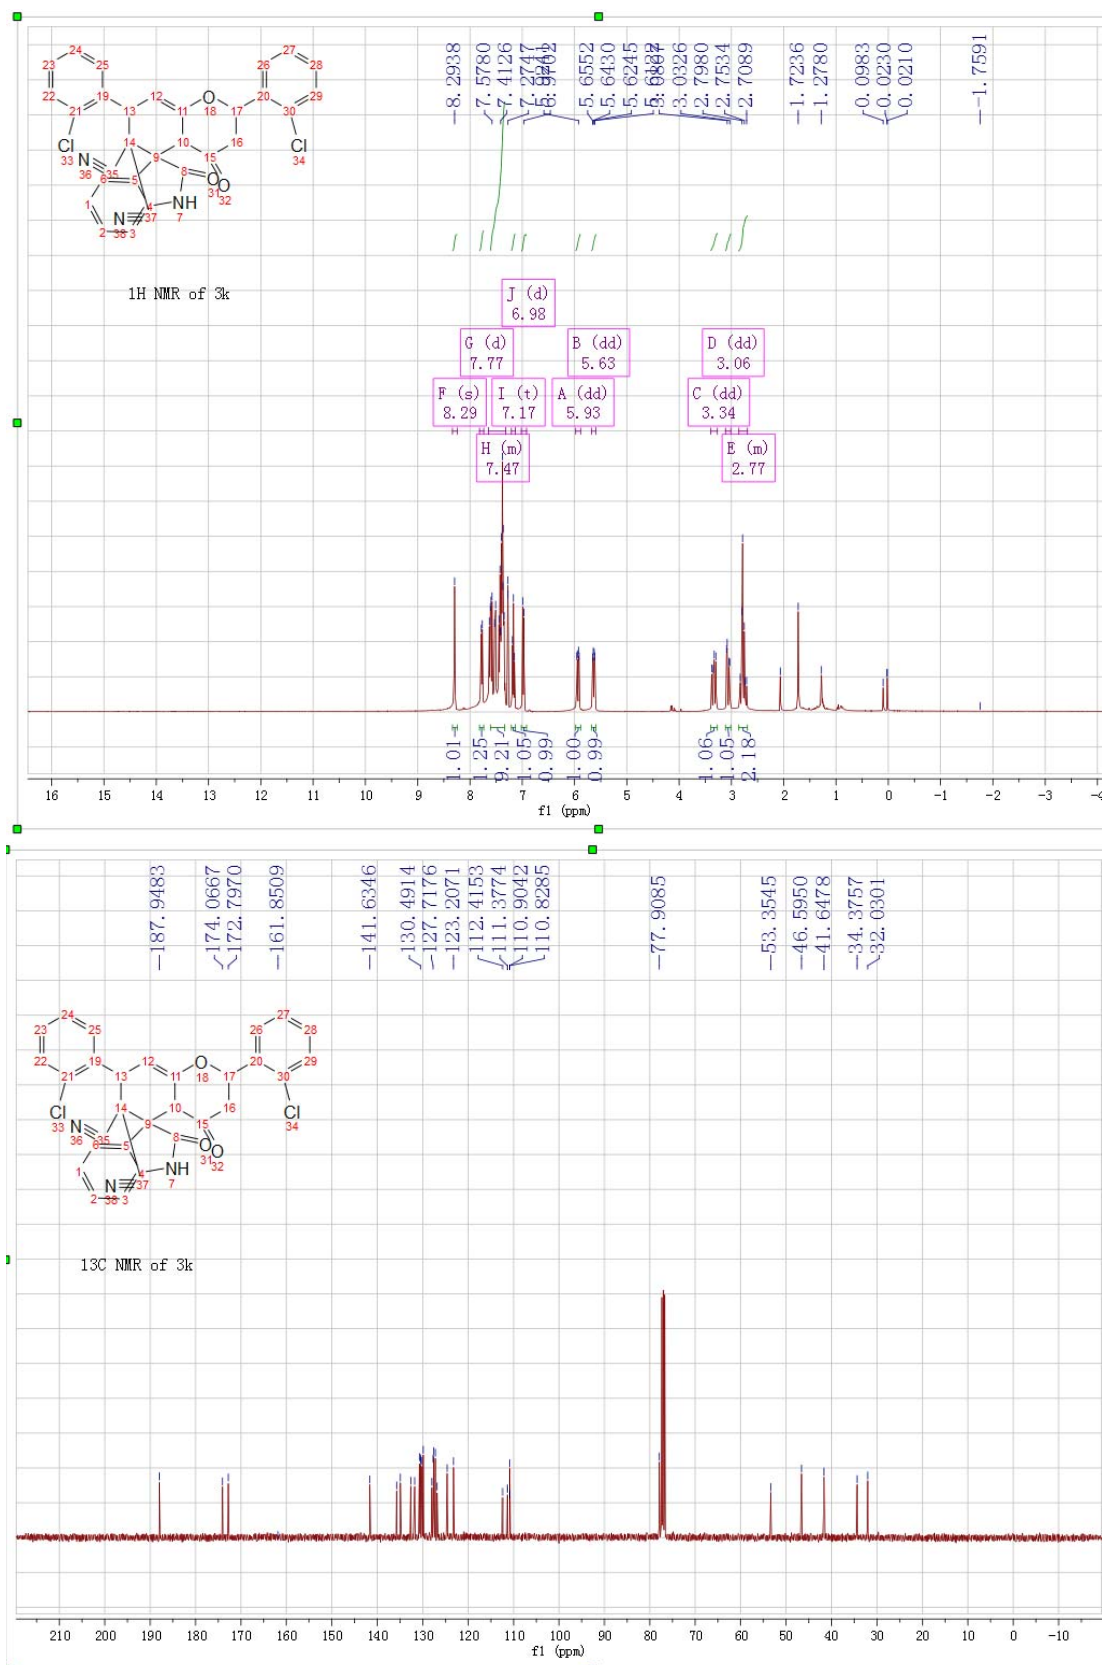

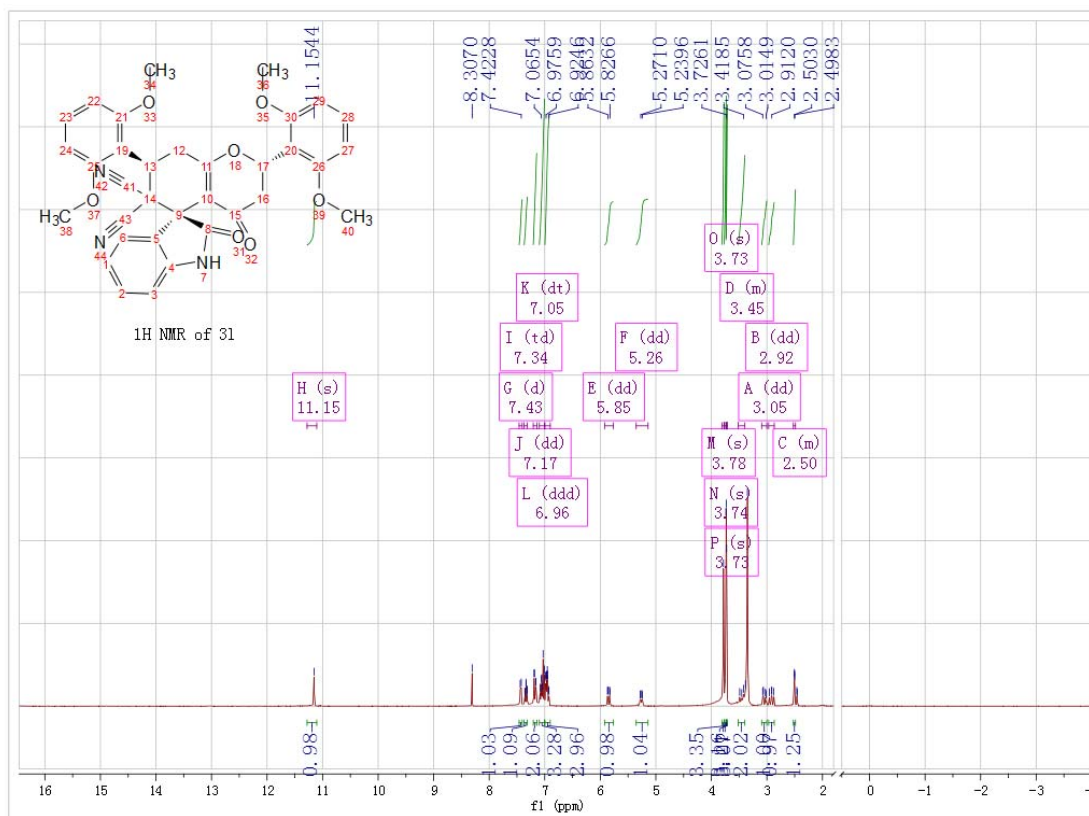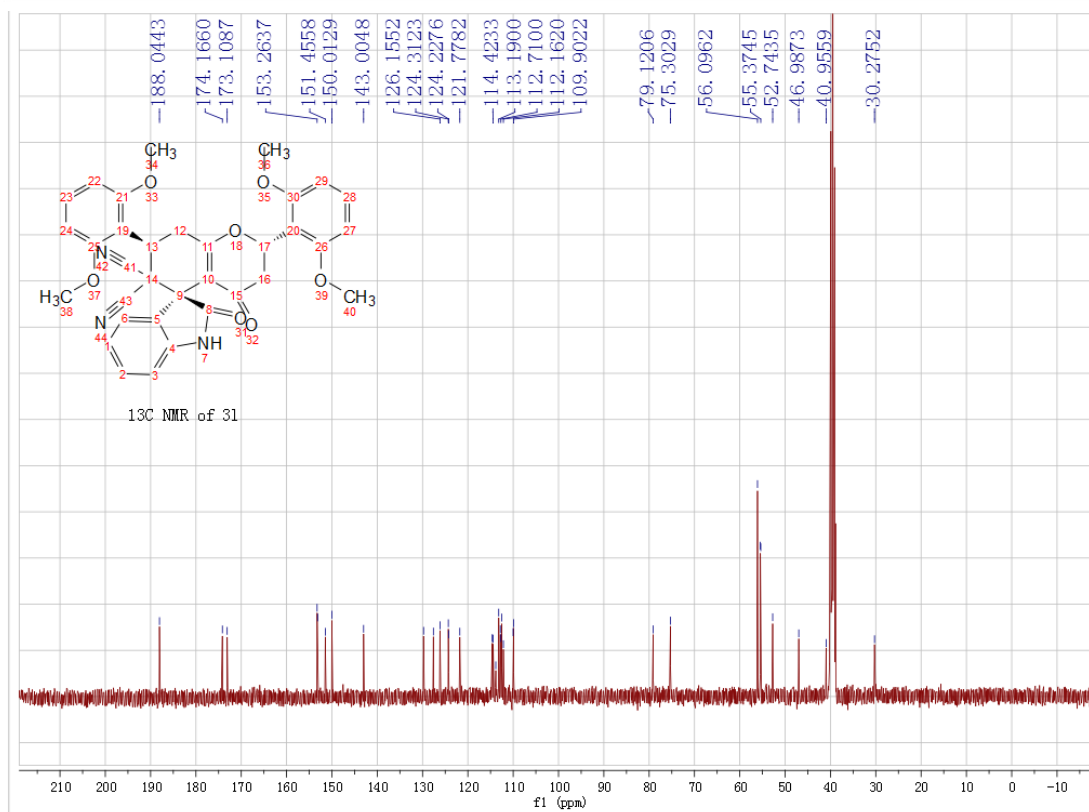

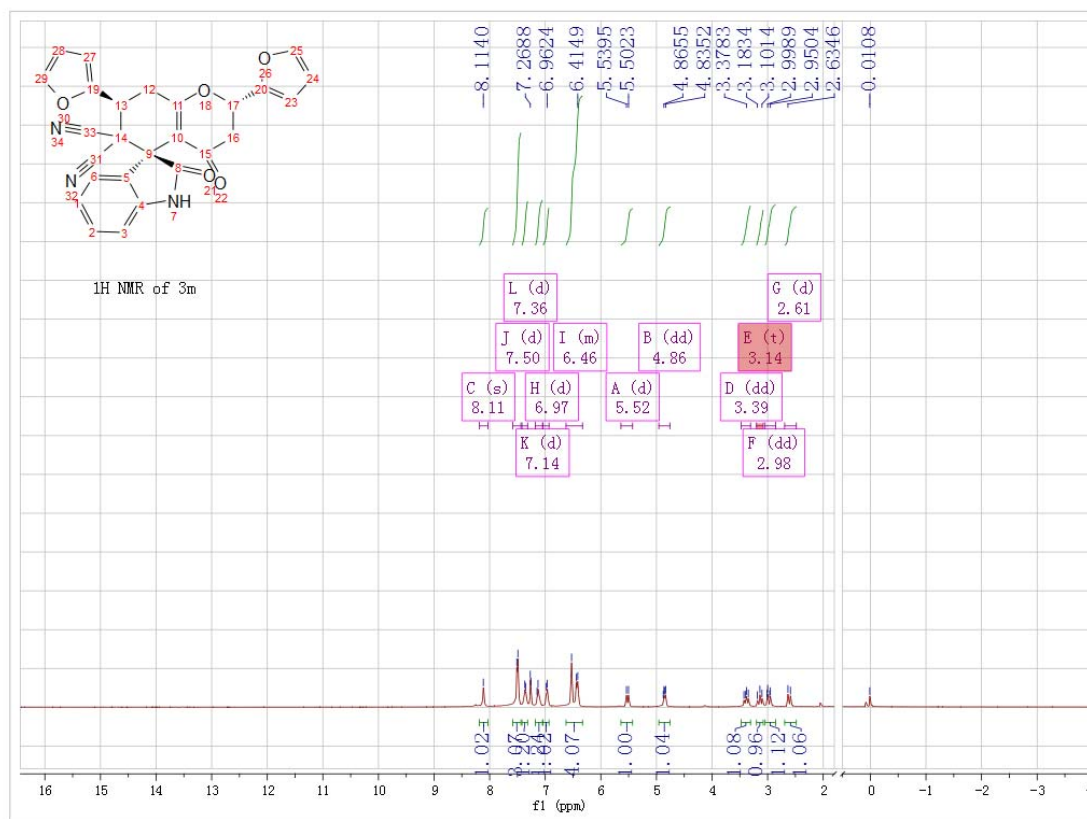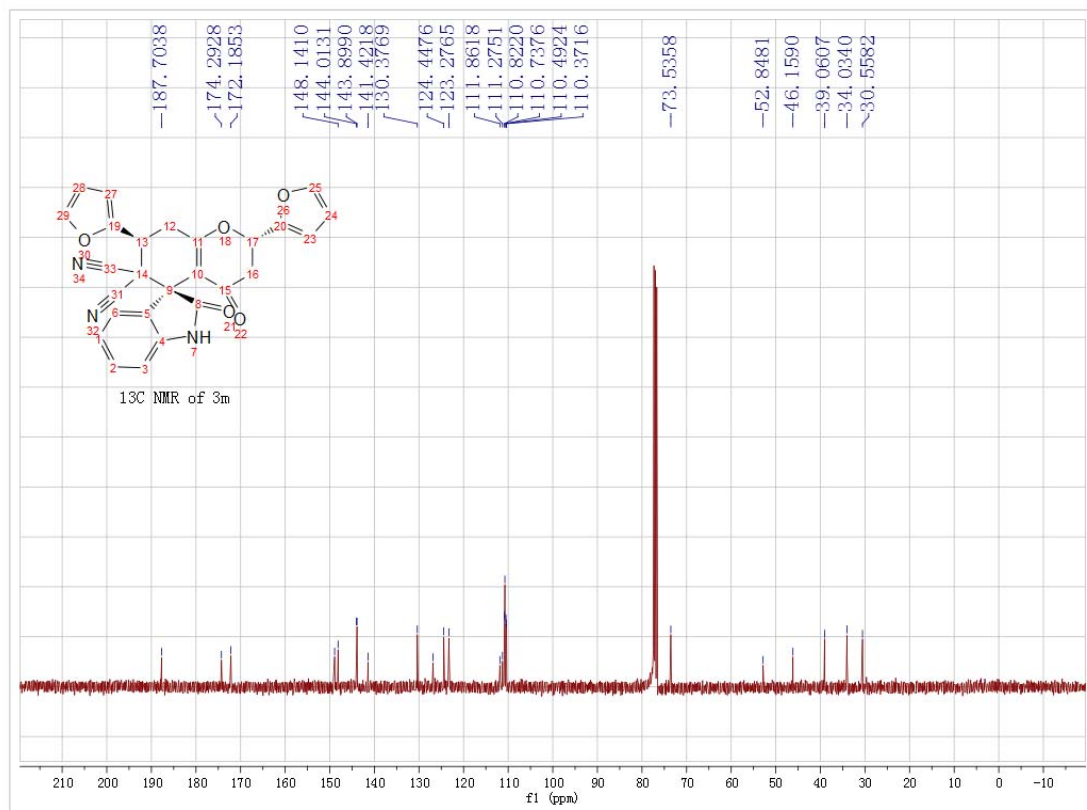



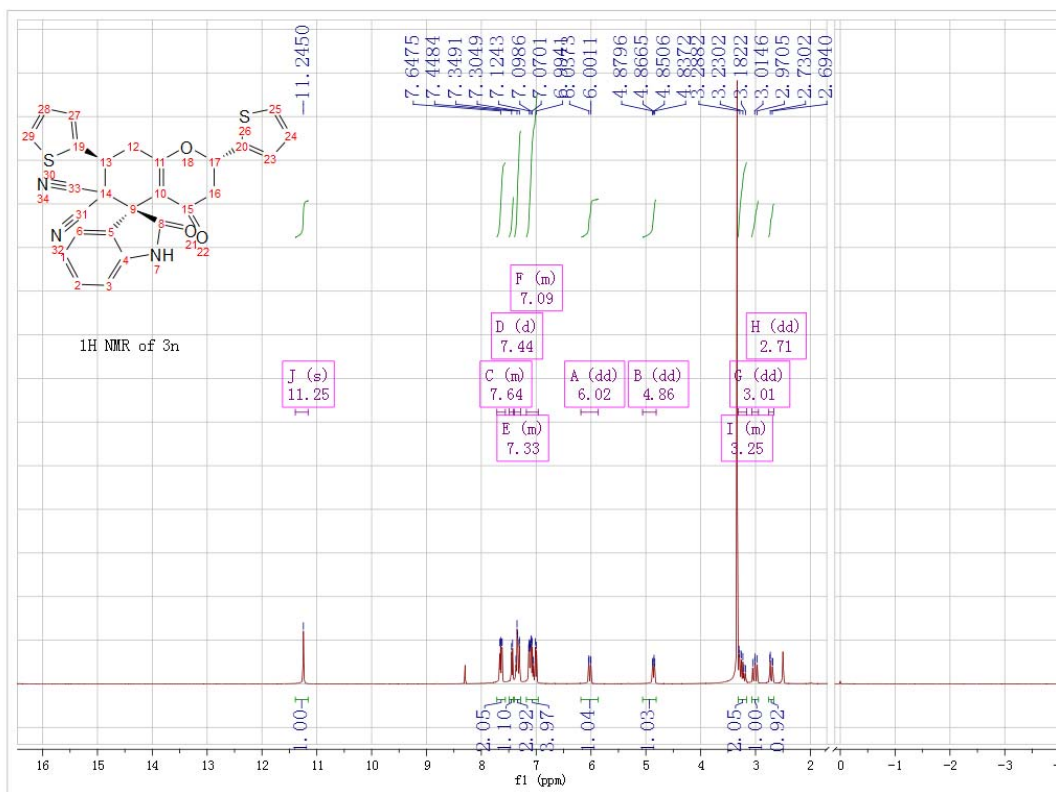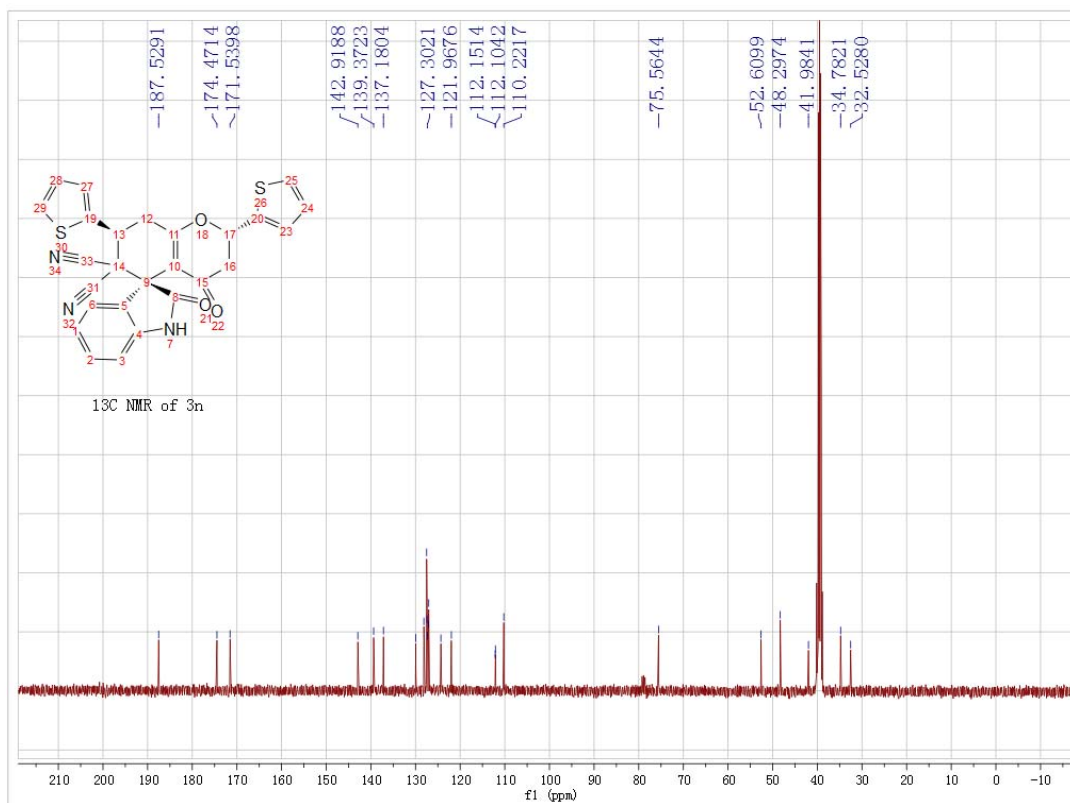

### References of supplementary information

- 1 For the synthesis of curcumin derivatives, see: A. Mazumder, N. Neamati, S. Sunder, J. Schulz, H. Pertz, E. Eich and Y. Pommier, *J. Med. Chem.*, 1997, **40**, 3057.
- 2 For the synthesis of isatylidene malononitriles, see: H. Liu, G. L. Dou and D. Q. Shi, *J. Comb. Chem.*, 2010, **12**, 292.
